# Supplementary material
Source: publisher site journal article supplement (https://www.dovepress.com/article/491216)
Supplement: Supplementary file 1 [file get_supplementary_file.php]

**Supplementary materials**

**Supplementary Table 1.** The summary information for instrumental variables of Chronotype.

| **Sort** | **Phenotype** | **SNP** | **effect_allele** | **other_allele** | **beta** | **se** | **eaf** | **pval** | **F-statistic** |
| --- | --- | --- | --- | --- | --- | --- | --- | --- | --- |
| 1 | Chronotype | rs17374439 | C | T | -0.034 | 0.003 | 0.803 | 1.20E-23 | 102.047 |
| 2 | Chronotype | rs17448682 | C | T | -0.022 | 0.003 | 0.768 | 2.20E-12 | 48.454 |
| 3 | Chronotype | rs3816454 | T | G | 0.020 | 0.003 | 0.375 | 4.90E-13 | 52.124 |
| 4 | Chronotype | rs12140153 | G | T | 0.034 | 0.005 | 0.905 | 1.60E-13 | 52.632 |
| 5 | Chronotype | rs7547493 | A | G | -0.038 | 0.004 | 0.822 | 3.90E-27 | 115.382 |
| 6 | Chronotype | rs985277 | T | G | -0.015 | 0.003 | 0.400 | 1.70E-08 | 30.879 |
| 7 | Chronotype | rs11588913 | G | A | 0.015 | 0.003 | 0.602 | 1.50E-08 | 31.838 |
| 8 | Chronotype | rs72720396 | A | G | -0.027 | 0.003 | 0.770 | 8.40E-18 | 72.526 |
| 9 | Chronotype | rs4949980 | A | G | -0.032 | 0.005 | 0.932 | 2.70E-09 | 35.612 |
| 10 | Chronotype | rs17575798 | G | A | 0.023 | 0.003 | 0.807 | 4.20E-11 | 44.170 |
| 11 | Chronotype | rs11587758 | G | A | -0.024 | 0.003 | 0.604 | 5.50E-19 | 77.570 |
| 12 | Chronotype | rs140206235 | C | T | -0.055 | 0.010 | 0.981 | 2.30E-08 | 30.872 |
| 13 | Chronotype | rs975025 | C | T | 0.032 | 0.005 | 0.923 | 1.30E-10 | 40.819 |
| 14 | Chronotype | rs509476 | T | C | 0.114 | 0.008 | 0.030 | 5.70E-47 | 209.387 |
| 15 | Chronotype | rs13011556 | C | G | -0.023 | 0.003 | 0.761 | 1.10E-12 | 51.771 |
| 16 | Chronotype | rs2712056 | C | T | -0.022 | 0.003 | 0.815 | 5.10E-11 | 41.076 |
| 17 | Chronotype | rs75120545 | C | T | -0.061 | 0.008 | 0.970 | 1.10E-13 | 54.896 |
| 18 | Chronotype | rs786406 | A | G | -0.024 | 0.003 | 0.298 | 1.90E-16 | 64.521 |
| 19 | Chronotype | rs10495976 | A | T | -0.018 | 0.003 | 0.610 | 5.10E-11 | 41.622 |
| 20 | Chronotype | rs7602425 | C | T | -0.031 | 0.005 | 0.924 | 8.50E-10 | 37.464 |
| 21 | Chronotype | rs359250 | G | T | -0.017 | 0.003 | 0.364 | 9.20E-10 | 36.575 |
| 22 | Chronotype | rs778138 | A | C | -0.021 | 0.003 | 0.649 | 6.90E-13 | 53.659 |
| 23 | Chronotype | rs2311837 | T | C | -0.015 | 0.003 | 0.592 | 3.60E-08 | 30.835 |
| 24 | Chronotype | rs6744983 | G | T | -0.016 | 0.003 | 0.622 | 3.60E-09 | 34.624 |
| 25 | Chronotype | rs10520176 | T | C | 0.023 | 0.003 | 0.502 | 1.40E-17 | 74.098 |
| 26 | Chronotype | rs28380327 | A | T | 0.021 | 0.003 | 0.629 | 2.90E-13 | 54.547 |
| 27 | Chronotype | rs1947198 | C | T | -0.024 | 0.004 | 0.878 | 1.80E-09 | 34.878 |
| 28 | Chronotype | rs197273 | A | G | 0.016 | 0.003 | 0.470 | 1.30E-08 | 34.714 |
| 29 | Chronotype | rs1064213 | G | A | -0.019 | 0.003 | 0.522 | 1.30E-12 | 50.782 |
| 30 | Chronotype | rs114670539 | C | T | -0.034 | 0.006 | 0.942 | 4.60E-09 | 34.830 |
| 31 | Chronotype | rs57435966 | C | T | 0.055 | 0.005 | 0.913 | 2.60E-30 | 132.835 |
| 32 | Chronotype | rs114870822 | G | A | -0.070 | 0.012 | 0.987 | 2.00E-09 | 33.642 |
| 33 | Chronotype | rs62182135 | C | A | 0.018 | 0.003 | 0.668 | 3.70E-10 | 39.698 |
| 34 | Chronotype | rs149611468 | T | C | 0.078 | 0.013 | 0.988 | 8.50E-10 | 37.977 |
| 35 | Chronotype | rs6442446 | A | G | 0.017 | 0.003 | 0.291 | 3.10E-09 | 34.543 |
| 36 | Chronotype | rs9817740 | A | G | 0.018 | 0.003 | 0.784 | 2.00E-08 | 30.270 |
| 37 | Chronotype | rs13059636 | A | G | -0.018 | 0.003 | 0.528 | 1.60E-11 | 45.707 |
| 38 | Chronotype | rs114848860 | A | T | -0.056 | 0.009 | 0.976 | 3.60E-10 | 40.574 |
| 39 | Chronotype | rs11712056 | T | C | 0.020 | 0.003 | 0.556 | 1.60E-13 | 55.205 |
| 40 | Chronotype | rs17399554 | G | A | -0.018 | 0.003 | 0.746 | 1.70E-08 | 33.571 |
| 41 | Chronotype | rs11924337 | G | C | -0.019 | 0.003 | 0.728 | 2.20E-10 | 39.920 |
| 42 | Chronotype | rs957501 | T | A | 0.015 | 0.003 | 0.336 | 3.00E-08 | 29.348 |
| 43 | Chronotype | rs1800828 | C | G | 0.018 | 0.003 | 0.746 | 1.70E-08 | 32.642 |
| 44 | Chronotype | rs13065394 | G | T | 0.018 | 0.003 | 0.712 | 3.00E-09 | 34.874 |
| 45 | Chronotype | rs885255 | T | C | 0.017 | 0.003 | 0.348 | 4.40E-09 | 35.882 |
| 46 | Chronotype | rs9831488 | A | G | -0.018 | 0.003 | 0.650 | 8.40E-11 | 41.636 |
| 47 | Chronotype | rs3850174 | T | A | 0.019 | 0.003 | 0.743 | 6.80E-10 | 39.369 |
| 48 | Chronotype | rs2239626 | T | C | -0.020 | 0.003 | 0.695 | 2.30E-12 | 47.987 |
| 49 | Chronotype | rs231398 | G | A | 0.021 | 0.004 | 0.838 | 8.40E-09 | 32.048 |
| 50 | Chronotype | rs28634184 | C | T | 0.018 | 0.003 | 0.749 | 2.80E-08 | 32.223 |
| 51 | Chronotype | rs6846730 | C | T | 0.022 | 0.003 | 0.768 | 5.60E-12 | 47.900 |
| 52 | Chronotype | rs4339281 | A | G | 0.022 | 0.004 | 0.873 | 3.20E-08 | 30.512 |
| 53 | Chronotype | rs4241964 | T | G | -0.021 | 0.003 | 0.525 | 1.10E-14 | 58.781 |
| 54 | Chronotype | rs10067113 | C | T | -0.016 | 0.003 | 0.381 | 6.30E-09 | 34.262 |
| 55 | Chronotype | rs7701529 | A | T | -0.019 | 0.003 | 0.238 | 3.60E-09 | 35.285 |
| 56 | Chronotype | rs11748798 | G | T | 0.020 | 0.003 | 0.750 | 5.20E-11 | 43.236 |
| 57 | Chronotype | rs56947091 | C | T | -0.019 | 0.003 | 0.489 | 6.00E-13 | 50.981 |
| 58 | Chronotype | rs12055234 | G | A | -0.019 | 0.003 | 0.672 | 4.00E-11 | 43.377 |
| 59 | Chronotype | rs286805 | A | T | 0.014 | 0.003 | 0.477 | 4.50E-08 | 28.173 |
| 60 | Chronotype | rs1027742 | A | G | 0.018 | 0.003 | 0.738 | 2.80E-09 | 35.699 |
| 61 | Chronotype | rs4246036 | C | T | 0.024 | 0.003 | 0.292 | 2.40E-15 | 64.388 |
| 62 | Chronotype | rs7735794 | G | A | -0.020 | 0.003 | 0.776 | 4.70E-09 | 34.911 |
| 63 | Chronotype | rs9395520 | C | T | -0.023 | 0.003 | 0.695 | 2.10E-15 | 62.768 |
| 64 | Chronotype | rs521977 | T | G | 0.016 | 0.003 | 0.322 | 2.10E-08 | 31.119 |
| 65 | Chronotype | rs4714475 | G | T | 0.019 | 0.003 | 0.754 | 1.60E-09 | 35.833 |
| 66 | Chronotype | rs62405438 | T | A | -0.020 | 0.004 | 0.820 | 6.30E-09 | 33.264 |
| 67 | Chronotype | rs2653349 | A | G | 0.039 | 0.003 | 0.215 | 5.20E-32 | 139.860 |
| 68 | Chronotype | rs2881955 | C | T | -0.016 | 0.003 | 0.721 | 4.30E-08 | 28.834 |
| 69 | Chronotype | rs60616179 | A | G | 0.038 | 0.006 | 0.945 | 1.10E-10 | 39.938 |
| 70 | Chronotype | rs520954 | A | G | -0.024 | 0.003 | 0.673 | 1.00E-16 | 68.101 |
| 71 | Chronotype | rs9364767 | T | G | 0.016 | 0.003 | 0.447 | 5.40E-09 | 34.495 |
| 72 | Chronotype | rs9348050 | T | C | 0.017 | 0.003 | 0.489 | 7.50E-10 | 38.242 |
| 73 | Chronotype | rs10280205 | T | C | 0.017 | 0.003 | 0.692 | 1.40E-09 | 35.898 |
| 74 | Chronotype | rs17161045 | T | C | 0.021 | 0.003 | 0.631 | 7.20E-14 | 54.223 |
| 75 | Chronotype | rs6967481 | C | T | -0.021 | 0.003 | 0.503 | 6.90E-15 | 58.488 |
| 76 | Chronotype | rs2968511 | C | G | -0.017 | 0.003 | 0.695 | 4.90E-09 | 35.771 |
| 77 | Chronotype | rs202157 | C | T | 0.026 | 0.003 | 0.299 | 4.10E-18 | 75.346 |
| 78 | Chronotype | rs4729854 | T | A | 0.029 | 0.003 | 0.517 | 3.30E-25 | 109.030 |
| 79 | Chronotype | rs1113295 | T | G | 0.016 | 0.003 | 0.441 | 6.80E-09 | 33.535 |
| 80 | Chronotype | rs2971970 | T | G | 0.019 | 0.003 | 0.218 | 6.00E-09 | 33.435 |
| 81 | Chronotype | rs35524253 | G | A | -0.016 | 0.003 | 0.643 | 5.80E-09 | 31.805 |
| 82 | Chronotype | rs11786306 | G | C | -0.018 | 0.003 | 0.646 | 8.70E-11 | 41.931 |
| 83 | Chronotype | rs13255030 | A | G | 0.016 | 0.003 | 0.585 | 2.80E-09 | 35.244 |
| 84 | Chronotype | rs12541362 | A | T | -0.021 | 0.003 | 0.650 | 3.50E-14 | 57.174 |
| 85 | Chronotype | rs769066 | T | C | -0.022 | 0.003 | 0.817 | 3.20E-10 | 39.695 |
| 86 | Chronotype | rs4321976 | T | C | 0.023 | 0.003 | 0.779 | 3.10E-13 | 51.686 |
| 87 | Chronotype | rs3100052 | A | G | 0.017 | 0.003 | 0.387 | 6.90E-10 | 38.278 |
| 88 | Chronotype | rs3808477 | C | T | -0.022 | 0.003 | 0.719 | 2.80E-13 | 51.960 |
| 89 | Chronotype | rs34340407 | T | C | -0.018 | 0.003 | 0.753 | 4.30E-09 | 35.095 |
| 90 | Chronotype | rs6477309 | C | T | -0.017 | 0.003 | 0.335 | 8.00E-10 | 37.112 |
| 91 | Chronotype | rs308521 | T | C | 0.020 | 0.003 | 0.603 | 3.70E-13 | 52.580 |
| 92 | Chronotype | rs62553781 | C | T | 0.050 | 0.007 | 0.965 | 1.20E-11 | 47.065 |
| 93 | Chronotype | rs4838161 | T | G | 0.016 | 0.003 | 0.561 | 2.20E-09 | 35.467 |
| 94 | Chronotype | rs10988239 | C | T | 0.019 | 0.003 | 0.487 | 1.60E-11 | 46.483 |
| 95 | Chronotype | rs34619169 | G | A | -0.017 | 0.003 | 0.692 | 3.80E-09 | 33.643 |
| 96 | Chronotype | rs28458909 | C | T | 0.043 | 0.004 | 0.876 | 2.60E-26 | 112.666 |
| 97 | Chronotype | rs4948547 | C | A | 0.019 | 0.003 | 0.256 | 1.20E-09 | 38.094 |
| 98 | Chronotype | rs10823233 | T | C | -0.015 | 0.003 | 0.452 | 4.30E-08 | 31.512 |
| 99 | Chronotype | rs3808964 | G | T | -0.016 | 0.003 | 0.365 | 2.70E-08 | 31.568 |
| 100 | Chronotype | rs72632979 | A | G | 0.022 | 0.004 | 0.828 | 1.20E-09 | 36.419 |
| 101 | Chronotype | rs10742179 | A | G | 0.018 | 0.003 | 0.260 | 1.50E-09 | 35.644 |
| 102 | Chronotype | rs4141920 | G | A | 0.016 | 0.003 | 0.544 | 4.60E-09 | 33.302 |
| 103 | Chronotype | rs11032362 | G | A | -0.040 | 0.005 | 0.909 | 4.80E-17 | 71.559 |
| 104 | Chronotype | rs34239319 | G | T | -0.028 | 0.004 | 0.898 | 3.90E-10 | 39.831 |
| 105 | Chronotype | rs11229545 | A | G | 0.021 | 0.003 | 0.760 | 2.90E-11 | 43.552 |
| 106 | Chronotype | rs11227452 | G | A | -0.019 | 0.004 | 0.828 | 4.60E-08 | 29.431 |
| 107 | Chronotype | rs4237555 | C | T | -0.016 | 0.003 | 0.473 | 6.00E-10 | 37.427 |
| 108 | Chronotype | rs4936291 | A | G | -0.018 | 0.003 | 0.611 | 3.80E-10 | 40.050 |
| 109 | Chronotype | rs74357745 | A | G | 0.027 | 0.004 | 0.879 | 8.70E-11 | 41.483 |
| 110 | Chronotype | rs7977610 | A | T | 0.016 | 0.003 | 0.673 | 2.10E-08 | 31.201 |
| 111 | Chronotype | rs12811046 | A | G | 0.017 | 0.003 | 0.553 | 6.20E-10 | 39.389 |
| 112 | Chronotype | rs7313852 | G | A | 0.030 | 0.003 | 0.565 | 2.70E-27 | 119.179 |
| 113 | Chronotype | rs77384811 | G | C | 0.025 | 0.004 | 0.843 | 2.80E-11 | 44.075 |
| 114 | Chronotype | rs7959983 | T | C | -0.020 | 0.003 | 0.596 | 9.50E-13 | 51.212 |
| 115 | Chronotype | rs7304278 | A | G | -0.020 | 0.003 | 0.275 | 2.20E-11 | 44.904 |
| 116 | Chronotype | rs80097534 | G | T | 0.028 | 0.005 | 0.901 | 9.30E-10 | 38.072 |
| 117 | Chronotype | rs9597250 | C | A | 0.021 | 0.003 | 0.810 | 6.90E-10 | 38.408 |
| 118 | Chronotype | rs9573971 | A | G | 0.073 | 0.007 | 0.966 | 3.60E-22 | 95.825 |
| 119 | Chronotype | rs17267683 | C | G | 0.020 | 0.003 | 0.761 | 2.70E-10 | 38.868 |
| 120 | Chronotype | rs17517 | G | A | 0.015 | 0.003 | 0.487 | 3.00E-08 | 30.294 |
| 121 | Chronotype | rs1952923 | G | A | 0.017 | 0.003 | 0.261 | 3.60E-08 | 30.426 |
| 122 | Chronotype | rs698015 | C | T | -0.016 | 0.003 | 0.353 | 8.80E-09 | 32.112 |
| 123 | Chronotype | rs7148842 | C | T | 0.015 | 0.003 | 0.612 | 1.80E-08 | 30.529 |
| 124 | Chronotype | rs10149448 | A | G | 0.016 | 0.003 | 0.604 | 2.70E-09 | 35.694 |
| 125 | Chronotype | rs12432176 | C | A | -0.016 | 0.003 | 0.621 | 6.50E-09 | 33.508 |
| 126 | Chronotype | rs59986227 | C | G | -0.018 | 0.003 | 0.742 | 8.30E-09 | 33.072 |
| 127 | Chronotype | rs9932577 | C | A | 0.017 | 0.003 | 0.495 | 6.80E-10 | 37.476 |
| 128 | Chronotype | rs12927162 | A | G | 0.029 | 0.003 | 0.722 | 6.80E-22 | 91.160 |
| 129 | Chronotype | rs1421085 | T | C | -0.028 | 0.003 | 0.597 | 1.50E-23 | 101.131 |
| 130 | Chronotype | rs4784655 | G | C | 0.021 | 0.003 | 0.679 | 1.50E-13 | 53.551 |
| 131 | Chronotype | rs17604349 | G | A | 0.026 | 0.004 | 0.821 | 1.70E-13 | 53.651 |
| 132 | Chronotype | rs2518022 | T | C | 0.040 | 0.005 | 0.084 | 4.80E-17 | 69.044 |
| 133 | Chronotype | rs3760185 | C | T | 0.024 | 0.003 | 0.752 | 2.60E-14 | 58.834 |
| 134 | Chronotype | rs226090 | C | T | 0.021 | 0.004 | 0.168 | 4.10E-09 | 33.724 |
| 135 | Chronotype | rs28647842 | G | C | 0.016 | 0.003 | 0.477 | 2.00E-09 | 35.636 |
| 136 | Chronotype | rs72829706 | A | G | 0.041 | 0.007 | 0.961 | 5.10E-09 | 34.452 |
| 137 | Chronotype | rs114352914 | G | A | -0.020 | 0.003 | 0.812 | 7.90E-09 | 33.072 |
| 138 | Chronotype | rs2364972 | A | G | -0.016 | 0.003 | 0.537 | 2.10E-09 | 36.007 |
| 139 | Chronotype | rs62082406 | C | T | -0.026 | 0.003 | 0.808 | 1.60E-14 | 55.949 |
| 140 | Chronotype | rs4239386 | T | A | 0.022 | 0.003 | 0.665 | 1.00E-14 | 58.794 |
| 141 | Chronotype | rs12969848 | C | T | -0.022 | 0.003 | 0.470 | 1.30E-15 | 65.423 |
| 142 | Chronotype | rs9962650 | C | G | -0.017 | 0.003 | 0.577 | 1.60E-10 | 40.277 |
| 143 | Chronotype | rs9964420 | C | A | 0.028 | 0.003 | 0.695 | 8.60E-22 | 94.068 |
| 144 | Chronotype | rs56076457 | C | T | -0.016 | 0.003 | 0.471 | 1.30E-09 | 36.584 |
| 145 | Chronotype | rs10402849 | C | T | -0.019 | 0.003 | 0.799 | 8.90E-09 | 32.871 |
| 146 | Chronotype | rs9636202 | G | A | 0.018 | 0.003 | 0.734 | 7.50E-10 | 36.162 |
| 147 | Chronotype | rs11670534 | C | T | 0.021 | 0.004 | 0.834 | 8.50E-09 | 33.426 |
| 148 | Chronotype | rs78095690 | T | C | -0.016 | 0.003 | 0.564 | 1.40E-09 | 36.086 |
| 149 | Chronotype | rs6131942 | A | G | -0.018 | 0.003 | 0.420 | 9.40E-11 | 41.226 |
| 150 | Chronotype | rs2072727 | T | C | 0.016 | 0.003 | 0.436 | 8.50E-10 | 36.271 |
| 151 | Chronotype | rs139911 | C | T | 0.023 | 0.003 | 0.424 | 2.30E-17 | 73.292 |
| 152 | Chronotype | rs4822107 | G | A | -0.016 | 0.003 | 0.494 | 9.60E-09 | 32.923 |

SNP, single nucleotide polymorphism; se, standard error

**Supplementary Table 2.** The summary information for instrumental variables of Sleep duration.

| **Sort** | **Phenotype** | **SNP** | **effect_allele** | **other_allele** | **beta** | **se** | **eaf** | **pval** | **F-statistic** |
| --- | --- | --- | --- | --- | --- | --- | --- | --- | --- |
| 1 | Sleep duration | rs915416 | C | G | 0.019 | 0.002 | 0.290 | 9.90E-15 | 59.604 |
| 2 | Sleep duration | rs269054 | T | A | -0.014 | 0.002 | 0.578 | 2.10E-09 | 35.393 |
| 3 | Sleep duration | rs61796569 | C | T | -0.015 | 0.003 | 0.730 | 1.50E-09 | 36.270 |
| 4 | Sleep duration | rs12567114 | G | A | -0.015 | 0.003 | 0.724 | 4.30E-09 | 34.084 |
| 5 | Sleep duration | rs62120041 | T | C | 0.026 | 0.005 | 0.934 | 9.60E-09 | 32.575 |
| 6 | Sleep duration | rs374153 | C | T | 0.018 | 0.003 | 0.158 | 9.10E-09 | 32.213 |
| 7 | Sleep duration | rs2717076 | C | T | -0.018 | 0.002 | 0.373 | 3.10E-15 | 61.854 |
| 8 | Sleep duration | rs75539574 | A | C | -0.036 | 0.004 | 0.914 | 6.90E-19 | 79.507 |
| 9 | Sleep duration | rs7556815 | G | A | -0.041 | 0.003 | 0.781 | 1.30E-49 | 220.873 |
| 10 | Sleep duration | rs4128364 | T | C | -0.015 | 0.002 | 0.661 | 1.40E-09 | 37.265 |
| 11 | Sleep duration | rs11885663 | C | T | -0.016 | 0.003 | 0.752 | 8.60E-10 | 38.370 |
| 12 | Sleep duration | rs10173260 | T | C | -0.013 | 0.002 | 0.394 | 2.90E-08 | 30.795 |
| 13 | Sleep duration | rs112230981 | A | G | 0.032 | 0.005 | 0.950 | 2.20E-09 | 36.369 |
| 14 | Sleep duration | rs17732997 | C | G | 0.013 | 0.002 | 0.569 | 1.20E-08 | 31.953 |
| 15 | Sleep duration | rs7644809 | T | C | 0.013 | 0.002 | 0.422 | 1.60E-08 | 32.211 |
| 16 | Sleep duration | rs13088093 | T | G | -0.016 | 0.002 | 0.664 | 7.00E-12 | 45.879 |
| 17 | Sleep duration | rs2192528 | A | G | 0.013 | 0.002 | 0.480 | 2.70E-09 | 34.708 |
| 18 | Sleep duration | rs17427571 | A | G | 0.014 | 0.002 | 0.684 | 1.30E-08 | 32.226 |
| 19 | Sleep duration | rs35531607 | T | C | -0.013 | 0.002 | 0.526 | 1.50E-08 | 31.917 |
| 20 | Sleep duration | rs13109404 | T | G | 0.031 | 0.004 | 0.928 | 1.40E-12 | 50.103 |
| 21 | Sleep duration | rs365663 | A | G | 0.015 | 0.002 | 0.546 | 1.00E-10 | 41.220 |
| 22 | Sleep duration | rs465700 | C | G | 0.023 | 0.004 | 0.108 | 1.40E-09 | 37.562 |
| 23 | Sleep duration | rs56372231 | C | T | -0.017 | 0.002 | 0.666 | 2.20E-12 | 49.851 |
| 24 | Sleep duration | rs11567976 | C | T | -0.013 | 0.002 | 0.429 | 2.10E-08 | 31.396 |
| 25 | Sleep duration | rs151014368 | G | A | -0.016 | 0.003 | 0.794 | 9.10E-09 | 32.574 |
| 26 | Sleep duration | rs34556183 | A | G | 0.017 | 0.003 | 0.720 | 2.30E-11 | 44.981 |
| 27 | Sleep duration | rs113113059 | T | C | 0.016 | 0.003 | 0.780 | 8.40E-09 | 34.769 |
| 28 | Sleep duration | rs9382445 | T | C | 0.015 | 0.002 | 0.623 | 4.80E-10 | 38.791 |
| 29 | Sleep duration | rs2231265 | A | G | -0.015 | 0.003 | 0.228 | 2.70E-08 | 30.698 |
| 30 | Sleep duration | rs9345234 | A | C | -0.013 | 0.002 | 0.422 | 1.80E-08 | 32.034 |
| 31 | Sleep duration | rs34731055 | C | T | -0.019 | 0.003 | 0.819 | 3.70E-11 | 43.582 |
| 32 | Sleep duration | rs2079070 | C | G | 0.018 | 0.003 | 0.265 | 7.50E-12 | 46.751 |
| 33 | Sleep duration | rs7806045 | T | C | 0.015 | 0.003 | 0.755 | 1.40E-08 | 31.733 |
| 34 | Sleep duration | rs2001329 | C | T | 0.014 | 0.002 | 0.486 | 1.20E-09 | 37.911 |
| 35 | Sleep duration | rs73219758 | G | A | 0.016 | 0.002 | 0.708 | 5.60E-11 | 43.203 |
| 36 | Sleep duration | rs10973207 | G | T | -0.020 | 0.003 | 0.842 | 6.00E-11 | 42.785 |
| 37 | Sleep duration | rs1776776 | T | C | 0.020 | 0.003 | 0.874 | 4.90E-09 | 34.258 |
| 38 | Sleep duration | rs12246842 | A | G | 0.013 | 0.002 | 0.460 | 3.90E-09 | 34.690 |
| 39 | Sleep duration | rs10761674 | C | T | 0.012 | 0.002 | 0.477 | 4.20E-08 | 29.624 |
| 40 | Sleep duration | rs11190970 | G | A | 0.015 | 0.003 | 0.799 | 4.60E-08 | 29.674 |
| 41 | Sleep duration | rs7915425 | T | C | 0.019 | 0.003 | 0.175 | 2.00E-10 | 40.662 |
| 42 | Sleep duration | rs1517572 | A | C | -0.015 | 0.002 | 0.419 | 1.50E-10 | 40.728 |
| 43 | Sleep duration | rs4592416 | A | G | -0.015 | 0.002 | 0.536 | 9.30E-11 | 41.834 |
| 44 | Sleep duration | rs11039544 | G | A | 0.018 | 0.003 | 0.838 | 1.90E-09 | 35.795 |
| 45 | Sleep duration | rs174560 | T | C | -0.014 | 0.002 | 0.686 | 2.80E-08 | 31.036 |
| 46 | Sleep duration | rs12791153 | A | T | -0.024 | 0.004 | 0.919 | 1.90E-08 | 31.183 |
| 47 | Sleep duration | rs1553132 | A | G | -0.015 | 0.003 | 0.742 | 2.50E-08 | 31.506 |
| 48 | Sleep duration | rs1939455 | G | T | 0.020 | 0.004 | 0.879 | 1.20E-08 | 32.896 |
| 49 | Sleep duration | rs1079727 | T | C | -0.018 | 0.003 | 0.842 | 5.30E-09 | 34.740 |
| 50 | Sleep duration | rs1057703 | T | G | -0.019 | 0.003 | 0.853 | 1.10E-09 | 36.609 |
| 51 | Sleep duration | rs34354917 | C | A | 0.014 | 0.003 | 0.710 | 3.90E-08 | 30.214 |
| 52 | Sleep duration | rs4767550 | A | G | -0.014 | 0.002 | 0.586 | 6.30E-10 | 38.336 |
| 53 | Sleep duration | rs6575005 | T | C | 0.016 | 0.003 | 0.758 | 4.40E-09 | 34.710 |
| 54 | Sleep duration | rs10483350 | A | G | -0.017 | 0.003 | 0.805 | 1.50E-09 | 36.687 |
| 55 | Sleep duration | rs61985058 | C | T | -0.019 | 0.003 | 0.857 | 1.30E-08 | 33.160 |
| 56 | Sleep duration | rs55658675 | C | T | 0.013 | 0.002 | 0.645 | 2.00E-08 | 30.774 |
| 57 | Sleep duration | rs11621908 | C | T | 0.024 | 0.004 | 0.917 | 5.60E-09 | 33.500 |
| 58 | Sleep duration | rs8038326 | A | G | 0.016 | 0.003 | 0.727 | 2.80E-10 | 39.264 |
| 59 | Sleep duration | rs3095508 | C | A | 0.015 | 0.002 | 0.594 | 3.10E-11 | 44.383 |
| 60 | Sleep duration | rs11643715 | C | G | -0.014 | 0.002 | 0.709 | 3.20E-08 | 30.976 |
| 61 | Sleep duration | rs9940278 | C | T | 0.017 | 0.002 | 0.578 | 1.20E-13 | 54.702 |
| 62 | Sleep duration | rs2032925 | C | T | -0.015 | 0.002 | 0.537 | 1.30E-10 | 41.335 |
| 63 | Sleep duration | rs3027234 | C | T | 0.015 | 0.003 | 0.773 | 2.30E-08 | 31.353 |
| 64 | Sleep duration | rs205024 | C | T | -0.014 | 0.002 | 0.616 | 3.90E-09 | 35.299 |
| 65 | Sleep duration | rs8072993 | T | G | -0.017 | 0.003 | 0.363 | 4.20E-10 | 38.366 |
| 66 | Sleep duration | rs147114641 | C | A | 0.016 | 0.003 | 0.774 | 3.10E-09 | 34.931 |
| 67 | Sleep duration | rs2696429 | G | A | 0.017 | 0.003 | 0.774 | 4.00E-10 | 38.904 |
| 68 | Sleep duration | rs12607679 | T | C | 0.020 | 0.003 | 0.738 | 8.30E-15 | 60.327 |
| 69 | Sleep duration | rs10421649 | T | A | -0.013 | 0.002 | 0.443 | 6.90E-09 | 33.583 |
| 70 | Sleep duration | rs2072727 | T | C | 0.013 | 0.002 | 0.436 | 7.90E-09 | 33.585 |

**Supplementary Table 3.** The summary information for instrumental variables of Short sleep duration.

| **Sort** | **Phenotype** | **SNP** | **effect_allele** | **other_allele** | **beta** | **se** | **eaf** | **pval** | **F-statistic** |
| --- | --- | --- | --- | --- | --- | --- | --- | --- | --- |
| 1 | Short sleep duration | rs7524118 | T | C | -0.006 | 0.001 | 0.292 | 4.90E-08 | 29.901 |
| 2 | Short sleep duration | rs2186122 | A | T | -0.006 | 0.001 | 0.438 | 4.80E-09 | 34.006 |
| 3 | Short sleep duration | rs12567114 | G | A | 0.006 | 0.001 | 0.725 | 4.10E-09 | 34.497 |
| 4 | Short sleep duration | rs2820313 | A | G | -0.006 | 0.001 | 0.659 | 2.30E-09 | 35.348 |
| 5 | Short sleep duration | rs1380703 | A | G | -0.007 | 0.001 | 0.616 | 1.60E-11 | 45.337 |
| 6 | Short sleep duration | rs2863957 | C | A | 0.010 | 0.001 | 0.782 | 2.60E-18 | 77.041 |
| 7 | Short sleep duration | rs2014830 | C | T | 0.006 | 0.001 | 0.698 | 2.70E-08 | 30.348 |
| 8 | Short sleep duration | rs17005118 | G | A | -0.006 | 0.001 | 0.735 | 2.50E-09 | 35.564 |
| 9 | Short sleep duration | rs13107325 | C | T | -0.013 | 0.002 | 0.925 | 2.50E-13 | 52.671 |
| 10 | Short sleep duration | rs12518468 | T | C | -0.006 | 0.001 | 0.672 | 8.50E-09 | 33.225 |
| 11 | Short sleep duration | rs3776864 | A | C | 0.006 | 0.001 | 0.667 | 1.70E-08 | 31.537 |
| 12 | Short sleep duration | rs4585442 | A | G | -0.006 | 0.001 | 0.689 | 8.10E-10 | 37.513 |
| 13 | Short sleep duration | rs2517827 | C | A | -0.006 | 0.001 | 0.689 | 5.70E-09 | 32.738 |
| 14 | Short sleep duration | rs12661667 | C | T | -0.006 | 0.001 | 0.737 | 2.80E-08 | 30.681 |
| 15 | Short sleep duration | rs9367621 | T | A | 0.005 | 0.001 | 0.431 | 1.60E-08 | 31.516 |
| 16 | Short sleep duration | rs9321171 | C | T | 0.005 | 0.001 | 0.540 | 4.20E-08 | 30.717 |
| 17 | Short sleep duration | rs11763750 | G | A | 0.007 | 0.001 | 0.814 | 5.10E-09 | 34.178 |
| 18 | Short sleep duration | rs1229762 | C | T | -0.007 | 0.001 | 0.335 | 1.00E-12 | 50.714 |
| 19 | Short sleep duration | rs60882754 | A | T | 0.011 | 0.002 | 0.939 | 1.80E-08 | 31.899 |
| 20 | Short sleep duration | rs1607227 | G | T | 0.006 | 0.001 | 0.705 | 1.50E-09 | 36.468 |
| 21 | Short sleep duration | rs7939345 | T | G | 0.006 | 0.001 | 0.208 | 4.00E-08 | 30.236 |
| 22 | Short sleep duration | rs17388803 | A | C | -0.010 | 0.002 | 0.894 | 6.50E-10 | 38.334 |
| 23 | Short sleep duration | rs59779556 | T | G | 0.005 | 0.001 | 0.554 | 2.00E-08 | 32.317 |
| 24 | Short sleep duration | rs205024 | C | T | 0.006 | 0.001 | 0.617 | 2.70E-08 | 31.231 |
| 25 | Short sleep duration | rs12963463 | C | T | 0.007 | 0.001 | 0.299 | 1.90E-11 | 45.038 |
| 26 | Short sleep duration | rs5757675 | G | T | 0.006 | 0.001 | 0.260 | 2.70E-09 | 34.498 |

**Supplementary Table 4.** The summary information for instrumental variables of Long sleep duration.

| **Sort** | **Phenotype** | **SNP** | **effect_allele** | **other_allele** | **beta** | **se** | **eaf** | **pval** | **F-statistic** |
| --- | --- | --- | --- | --- | --- | --- | --- | --- | --- |
| 1 | Long sleep duration | rs7534398 | T | A | -0.005 | 0.001 | 0.799 | 2.10E-08 | 31.256 |
| 2 | Long sleep duration | rs6737318 | A | G | -0.006 | 0.001 | 0.778 | 3.40E-13 | 52.982 |
| 3 | Long sleep duration | rs10899257 | G | A | -0.006 | 0.001 | 0.856 | 4.60E-08 | 29.889 |
| 4 | Long sleep duration | rs75458655 | C | T | -0.017 | 0.002 | 0.977 | 5.40E-12 | 47.681 |
| 5 | Long sleep duration | rs3751046 | A | G | -0.006 | 0.001 | 0.853 | 2.00E-08 | 31.606 |
| 6 | Long sleep duration | rs17817288 | A | G | 0.004 | 0.001 | 0.518 | 8.90E-09 | 33.233 |
| 7 | Long sleep duration | rs147114641 | C | A | 0.006 | 0.001 | 0.774 | 4.90E-11 | 42.999 |
| 8 | Long sleep duration | rs146467757 | G | T | 0.006 | 0.001 | 0.772 | 8.10E-11 | 42.004 |
| 9 | Long sleep duration | rs572857764 | T | A | 0.006 | 0.001 | 0.775 | 1.30E-10 | 41.115 |
| 10 | Long sleep duration | rs62073915 | A | G | 0.006 | 0.001 | 0.779 | 1.00E-11 | 46.154 |

**Supplementary Table 5.** The summary information for instrumental variables of Daytime napping.

| **Sort** | **Phenotype** | **SNP** | **effect_allele** | **other_allele** | **beta** | **se** | **eaf** | **pval** | **F-statistic** |
| --- | --- | --- | --- | --- | --- | --- | --- | --- | --- |
| 1 | Daytime napping | rs35570980 | G | A | -0.008 | 0.001 | 0.438 | 1.40E-10 | 39.519 |
| 2 | Daytime napping | rs2786547 | C | T | 0.011 | 0.002 | 0.823 | 1.00E-11 | 45.988 |
| 3 | Daytime napping | rs4653052 | C | A | -0.007 | 0.001 | 0.340 | 3.40E-08 | 30.224 |
| 4 | Daytime napping | rs12140153 | G | T | 0.025 | 0.002 | 0.905 | 2.40E-31 | 136.466 |
| 5 | Daytime napping | rs1931175 | C | G | -0.008 | 0.001 | 0.616 | 4.60E-10 | 38.722 |
| 6 | Daytime napping | rs12042846 | T | C | -0.009 | 0.002 | 0.821 | 1.90E-08 | 32.141 |
| 7 | Daytime napping | rs6665690 | A | C | 0.009 | 0.002 | 0.830 | 6.00E-09 | 32.743 |
| 8 | Daytime napping | rs35039375 | A | G | -0.014 | 0.002 | 0.908 | 8.70E-11 | 41.819 |
| 9 | Daytime napping | rs200435329 | G | T | -0.010 | 0.001 | 0.762 | 9.90E-12 | 47.048 |
| 10 | Daytime napping | rs2250377 | A | G | 0.013 | 0.001 | 0.339 | 1.40E-24 | 105.682 |
| 11 | Daytime napping | rs13033444 | A | G | -0.010 | 0.001 | 0.717 | 3.60E-13 | 52.059 |
| 12 | Daytime napping | rs75022160 | C | T | 0.010 | 0.002 | 0.863 | 1.70E-08 | 31.213 |
| 13 | Daytime napping | rs13023587 | C | G | 0.007 | 0.001 | 0.491 | 6.50E-10 | 37.764 |
| 14 | Daytime napping | rs350788 | A | C | 0.010 | 0.002 | 0.136 | 9.30E-09 | 32.004 |
| 15 | Daytime napping | rs17049683 | A | G | -0.008 | 0.001 | 0.667 | 4.10E-10 | 37.957 |
| 16 | Daytime napping | rs11125776 | T | G | 0.012 | 0.002 | 0.854 | 1.50E-11 | 45.615 |
| 17 | Daytime napping | rs2341089 | A | G | 0.012 | 0.002 | 0.087 | 2.00E-08 | 32.416 |
| 18 | Daytime napping | rs62189006 | A | G | 0.012 | 0.002 | 0.907 | 8.30E-09 | 33.225 |
| 19 | Daytime napping | rs80163246 | T | C | -0.012 | 0.002 | 0.883 | 1.40E-10 | 39.966 |
| 20 | Daytime napping | rs12992648 | A | G | 0.008 | 0.001 | 0.717 | 2.40E-08 | 32.301 |
| 21 | Daytime napping | rs7422655 | C | T | 0.008 | 0.001 | 0.263 | 1.10E-08 | 32.303 |
| 22 | Daytime napping | rs908442 | A | T | 0.010 | 0.001 | 0.591 | 1.40E-16 | 69.196 |
| 23 | Daytime napping | rs77154532 | A | G | 0.008 | 0.001 | 0.642 | 1.40E-09 | 36.666 |
| 24 | Daytime napping | rs12497609 | G | T | -0.009 | 0.002 | 0.837 | 3.20E-08 | 30.926 |
| 25 | Daytime napping | rs76824303 | A | C | 0.012 | 0.002 | 0.901 | 1.70E-08 | 32.249 |
| 26 | Daytime napping | rs4511908 | T | G | -0.007 | 0.001 | 0.419 | 1.40E-08 | 32.032 |
| 27 | Daytime napping | rs1601440 | C | T | 0.009 | 0.001 | 0.279 | 1.90E-11 | 45.316 |
| 28 | Daytime napping | rs2699869 | A | C | 0.007 | 0.001 | 0.454 | 3.10E-08 | 31.007 |
| 29 | Daytime napping | rs253666 | G | A | -0.008 | 0.001 | 0.235 | 1.80E-08 | 32.259 |
| 30 | Daytime napping | rs1001817 | C | T | 0.008 | 0.001 | 0.507 | 1.70E-10 | 40.786 |
| 31 | Daytime napping | rs7697461 | A | T | -0.008 | 0.001 | 0.258 | 6.00E-09 | 34.423 |
| 32 | Daytime napping | rs13150944 | A | G | -0.009 | 0.001 | 0.311 | 6.80E-11 | 42.339 |
| 33 | Daytime napping | rs4692709 | C | T | 0.007 | 0.001 | 0.455 | 2.40E-09 | 34.918 |
| 34 | Daytime napping | rs12657723 | C | T | -0.008 | 0.001 | 0.678 | 2.00E-10 | 39.716 |
| 35 | Daytime napping | rs6452787 | A | G | 0.008 | 0.001 | 0.536 | 2.00E-10 | 40.343 |
| 36 | Daytime napping | rs2943023 | C | T | 0.007 | 0.001 | 0.580 | 7.40E-09 | 33.330 |
| 37 | Daytime napping | rs467897 | G | A | 0.010 | 0.001 | 0.322 | 2.60E-13 | 53.956 |
| 38 | Daytime napping | rs2431108 | T | C | -0.013 | 0.001 | 0.671 | 7.70E-24 | 101.242 |
| 39 | Daytime napping | rs2099810 | A | G | 0.008 | 0.001 | 0.503 | 2.80E-10 | 40.114 |
| 40 | Daytime napping | rs10875606 | C | A | 0.007 | 0.001 | 0.316 | 1.30E-08 | 31.824 |
| 41 | Daytime napping | rs10875622 | G | A | -0.010 | 0.001 | 0.425 | 1.30E-17 | 72.454 |
| 42 | Daytime napping | rs73817091 | C | T | -0.017 | 0.003 | 0.958 | 3.80E-08 | 29.852 |
| 43 | Daytime napping | rs3799380 | T | C | 0.009 | 0.002 | 0.800 | 1.30E-08 | 34.586 |
| 44 | Daytime napping | rs34262487 | C | A | 0.015 | 0.002 | 0.928 | 1.20E-09 | 37.978 |
| 45 | Daytime napping | rs6919087 | T | G | 0.011 | 0.001 | 0.688 | 1.00E-16 | 67.579 |
| 46 | Daytime napping | rs9475168 | T | G | 0.009 | 0.001 | 0.781 | 1.90E-09 | 35.257 |
| 47 | Daytime napping | rs2653349 | A | G | 0.017 | 0.001 | 0.215 | 3.40E-29 | 126.009 |
| 48 | Daytime napping | rs2143792 | G | A | 0.007 | 0.001 | 0.568 | 9.10E-09 | 33.422 |
| 49 | Daytime napping | rs1546977 | A | G | -0.008 | 0.001 | 0.560 | 1.00E-11 | 45.789 |
| 50 | Daytime napping | rs9389556 | C | G | -0.008 | 0.001 | 0.739 | 9.70E-10 | 37.032 |
| 51 | Daytime napping | rs785145 | T | G | -0.007 | 0.001 | 0.569 | 1.00E-08 | 32.535 |
| 52 | Daytime napping | rs614987 | A | C | -0.011 | 0.001 | 0.386 | 7.50E-19 | 77.839 |
| 53 | Daytime napping | rs140506252 | A | T | 0.023 | 0.004 | 0.978 | 4.30E-08 | 30.896 |
| 54 | Daytime napping | rs9460110 | T | C | -0.007 | 0.001 | 0.630 | 8.40E-09 | 34.215 |
| 55 | Daytime napping | rs35851551 | A | G | 0.011 | 0.002 | 0.898 | 3.50E-08 | 30.511 |
| 56 | Daytime napping | rs10257273 | A | T | 0.011 | 0.002 | 0.851 | 8.90E-10 | 39.694 |
| 57 | Daytime napping | rs76257331 | G | A | -0.009 | 0.002 | 0.802 | 1.20E-08 | 32.508 |
| 58 | Daytime napping | rs13263535 | G | T | 0.007 | 0.001 | 0.531 | 1.60E-08 | 31.910 |
| 59 | Daytime napping | rs351776 | A | C | -0.008 | 0.001 | 0.450 | 8.40E-10 | 38.290 |
| 60 | Daytime napping | rs2059639 | C | T | 0.007 | 0.001 | 0.479 | 2.40E-08 | 30.139 |
| 61 | Daytime napping | rs285815 | T | A | 0.008 | 0.001 | 0.456 | 5.80E-10 | 38.107 |
| 62 | Daytime napping | rs7814873 | C | T | 0.007 | 0.001 | 0.383 | 1.50E-08 | 32.542 |
| 63 | Daytime napping | rs10811438 | G | C | 0.007 | 0.001 | 0.607 | 3.20E-09 | 33.719 |
| 64 | Daytime napping | rs17502738 | T | C | 0.009 | 0.002 | 0.804 | 2.00E-08 | 32.366 |
| 65 | Daytime napping | rs13284688 | T | C | -0.015 | 0.001 | 0.793 | 1.70E-23 | 101.101 |
| 66 | Daytime napping | rs295278 | G | A | 0.008 | 0.001 | 0.605 | 2.20E-10 | 40.209 |
| 67 | Daytime napping | rs971415 | A | G | 0.011 | 0.002 | 0.878 | 1.20E-09 | 35.733 |
| 68 | Daytime napping | rs4604518 | G | A | 0.007 | 0.001 | 0.546 | 1.40E-08 | 32.051 |
| 69 | Daytime napping | rs12346996 | T | C | 0.008 | 0.001 | 0.272 | 5.00E-09 | 34.036 |
| 70 | Daytime napping | rs11258652 | C | A | 0.010 | 0.001 | 0.763 | 3.70E-13 | 52.957 |
| 71 | Daytime napping | rs224111 | G | A | 0.008 | 0.001 | 0.612 | 1.60E-10 | 40.855 |
| 72 | Daytime napping | rs10840017 | A | G | 0.009 | 0.001 | 0.767 | 2.00E-09 | 36.450 |
| 73 | Daytime napping | rs10835420 | T | A | 0.009 | 0.001 | 0.751 | 1.70E-10 | 40.276 |
| 74 | Daytime napping | rs174541 | T | C | -0.010 | 0.001 | 0.640 | 4.40E-15 | 61.227 |
| 75 | Daytime napping | rs7932966 | A | T | 0.009 | 0.001 | 0.237 | 1.10E-09 | 37.348 |
| 76 | Daytime napping | rs530669754 | A | G | 0.012 | 0.002 | 0.877 | 1.60E-10 | 40.943 |
| 77 | Daytime napping | rs2417268 | A | T | -0.008 | 0.001 | 0.560 | 1.20E-09 | 37.089 |
| 78 | Daytime napping | rs35011311 | G | T | 0.009 | 0.001 | 0.734 | 4.40E-11 | 43.156 |
| 79 | Daytime napping | rs60222088 | C | A | 0.011 | 0.002 | 0.853 | 6.40E-11 | 42.528 |
| 80 | Daytime napping | rs11615756 | C | T | -0.018 | 0.001 | 0.595 | 1.40E-49 | 217.432 |
| 81 | Daytime napping | rs2769916 | G | A | -0.009 | 0.001 | 0.311 | 1.70E-11 | 44.414 |
| 82 | Daytime napping | rs10149986 | T | G | -0.011 | 0.002 | 0.815 | 4.40E-12 | 48.784 |
| 83 | Daytime napping | rs2370926 | T | C | 0.008 | 0.001 | 0.634 | 1.70E-10 | 41.418 |
| 84 | Daytime napping | rs11071755 | G | A | 0.007 | 0.001 | 0.575 | 5.20E-09 | 33.550 |
| 85 | Daytime napping | rs17158413 | G | A | -0.009 | 0.001 | 0.763 | 4.40E-11 | 41.869 |
| 86 | Daytime napping | rs10152428 | G | C | -0.008 | 0.001 | 0.270 | 1.10E-08 | 32.474 |
| 87 | Daytime napping | rs60920123 | G | A | 0.008 | 0.001 | 0.567 | 4.50E-10 | 38.749 |
| 88 | Daytime napping | rs9939355 | C | T | 0.007 | 0.001 | 0.442 | 4.50E-09 | 35.198 |
| 89 | Daytime napping | rs378421 | G | A | -0.007 | 0.001 | 0.583 | 2.40E-08 | 31.758 |
| 90 | Daytime napping | rs11860072 | C | T | 0.009 | 0.001 | 0.553 | 2.80E-13 | 52.459 |
| 91 | Daytime napping | rs528301822 | A | T | -0.008 | 0.001 | 0.713 | 2.80E-09 | 35.830 |
| 92 | Daytime napping | rs12451365 | T | C | -0.011 | 0.002 | 0.795 | 1.50E-12 | 49.943 |
| 93 | Daytime napping | rs385199 | A | C | 0.021 | 0.001 | 0.772 | 7.50E-47 | 208.103 |
| 94 | Daytime napping | rs112520848 | G | C | -0.007 | 0.001 | 0.614 | 1.80E-08 | 31.483 |
| 95 | Daytime napping | rs3935190 | G | A | -0.008 | 0.001 | 0.464 | 5.40E-11 | 42.904 |
| 96 | Daytime napping | rs962247 | G | A | 0.008 | 0.001 | 0.523 | 5.70E-11 | 42.266 |
| 97 | Daytime napping | rs2033103 | C | T | -0.007 | 0.001 | 0.548 | 2.60E-09 | 35.373 |
| 98 | Daytime napping | rs9965170 | G | A | 0.014 | 0.001 | 0.577 | 7.80E-29 | 123.180 |
| 99 | Daytime napping | rs17265513 | T | C | -0.009 | 0.002 | 0.801 | 2.00E-09 | 36.110 |
| 100 | Daytime napping | rs910187 | G | A | 0.007 | 0.001 | 0.626 | 4.90E-09 | 33.946 |
| 101 | Daytime napping | rs3810484 | A | G | 0.007 | 0.001 | 0.556 | 2.20E-08 | 31.344 |
| 102 | Daytime napping | rs1883048 | T | C | -0.008 | 0.001 | 0.476 | 1.80E-10 | 41.415 |
| 103 | Daytime napping | rs2284015 | C | G | -0.008 | 0.001 | 0.741 | 4.10E-08 | 30.930 |

**Supplementary Table 6.** The summary information for instrumental variables of Daytime sleepiness.

| **Sort** | **Phenotype** | **SNP** | **effect_allele** | **other_allele** | **beta** | **se** | **eaf** | **pval** | **F-statistic** |
| --- | --- | --- | --- | --- | --- | --- | --- | --- | --- |
| 1 | Daytime sleepiness | rs811483 | C | T | 0.008 | 0.001 | 0.833 | 2.00E-08 | 31.922 |
| 2 | Daytime sleepiness | rs12140153 | G | T | 0.017 | 0.002 | 0.905 | 2.80E-20 | 85.186 |
| 3 | Daytime sleepiness | rs501701 | A | G | 0.006 | 0.001 | 0.531 | 6.50E-09 | 34.161 |
| 4 | Daytime sleepiness | rs17131124 | C | G | -0.011 | 0.002 | 0.912 | 1.70E-09 | 37.027 |
| 5 | Daytime sleepiness | rs57746981 | C | T | 0.007 | 0.001 | 0.644 | 2.20E-10 | 40.068 |
| 6 | Daytime sleepiness | rs825127 | T | G | 0.006 | 0.001 | 0.531 | 9.50E-09 | 32.781 |
| 7 | Daytime sleepiness | rs4665972 | T | C | 0.007 | 0.001 | 0.394 | 3.90E-10 | 39.165 |
| 8 | Daytime sleepiness | rs7598712 | G | T | 0.006 | 0.001 | 0.555 | 2.20E-08 | 30.923 |
| 9 | Daytime sleepiness | rs6741951 | G | A | 0.007 | 0.001 | 0.711 | 2.70E-09 | 35.682 |
| 10 | Daytime sleepiness | rs11123962 | T | G | -0.008 | 0.001 | 0.553 | 7.50E-15 | 60.480 |
| 11 | Daytime sleepiness | rs9712275 | C | T | -0.006 | 0.001 | 0.486 | 1.30E-08 | 32.514 |
| 12 | Daytime sleepiness | rs7607363 | A | G | -0.006 | 0.001 | 0.561 | 8.00E-09 | 33.658 |
| 13 | Daytime sleepiness | rs13010456 | A | G | 0.008 | 0.001 | 0.595 | 2.10E-13 | 54.228 |
| 14 | Daytime sleepiness | rs13097760 | A | C | -0.006 | 0.001 | 0.639 | 3.20E-08 | 30.864 |
| 15 | Daytime sleepiness | rs960986 | C | T | 0.007 | 0.001 | 0.637 | 1.50E-11 | 44.950 |
| 16 | Daytime sleepiness | rs843372 | C | T | 0.008 | 0.001 | 0.230 | 2.20E-11 | 44.341 |
| 17 | Daytime sleepiness | rs11942333 | G | A | -0.006 | 0.001 | 0.676 | 3.80E-08 | 30.105 |
| 18 | Daytime sleepiness | rs13135092 | A | G | -0.010 | 0.002 | 0.917 | 3.10E-08 | 30.277 |
| 19 | Daytime sleepiness | rs6897863 | A | C | 0.006 | 0.001 | 0.584 | 7.60E-10 | 38.012 |
| 20 | Daytime sleepiness | rs12153518 | A | G | 0.007 | 0.001 | 0.472 | 6.80E-11 | 42.213 |
| 21 | Daytime sleepiness | rs6923811 | T | C | 0.007 | 0.001 | 0.679 | 9.10E-10 | 37.568 |
| 22 | Daytime sleepiness | rs55960940 | T | C | 0.008 | 0.001 | 0.822 | 2.00E-08 | 31.838 |
| 23 | Daytime sleepiness | rs3122170 | C | A | 0.010 | 0.001 | 0.231 | 5.60E-15 | 60.001 |
| 24 | Daytime sleepiness | rs62519825 | T | C | -0.009 | 0.002 | 0.887 | 3.80E-09 | 33.892 |
| 25 | Daytime sleepiness | rs285793 | G | A | 0.007 | 0.001 | 0.461 | 7.90E-11 | 42.685 |
| 26 | Daytime sleepiness | rs7837226 | A | G | -0.006 | 0.001 | 0.473 | 2.00E-08 | 30.916 |
| 27 | Daytime sleepiness | rs55818482 | T | C | -0.010 | 0.001 | 0.785 | 1.40E-14 | 59.701 |
| 28 | Daytime sleepiness | rs1566362 | T | C | 0.006 | 0.001 | 0.632 | 3.80E-09 | 34.971 |
| 29 | Daytime sleepiness | rs7476897 | G | A | 0.007 | 0.001 | 0.679 | 2.70E-11 | 45.466 |
| 30 | Daytime sleepiness | rs4765939 | G | C | -0.006 | 0.001 | 0.583 | 2.00E-09 | 36.011 |
| 31 | Daytime sleepiness | rs1846644 | T | C | -0.011 | 0.001 | 0.591 | 2.50E-27 | 117.438 |
| 32 | Daytime sleepiness | rs8015449 | A | G | 0.006 | 0.001 | 0.539 | 1.90E-09 | 35.812 |
| 33 | Daytime sleepiness | rs17356118 | A | G | -0.008 | 0.001 | 0.769 | 2.60E-10 | 39.320 |
| 34 | Daytime sleepiness | rs886114 | C | T | 0.006 | 0.001 | 0.357 | 1.90E-08 | 31.639 |
| 35 | Daytime sleepiness | rs11078398 | G | A | 0.008 | 0.001 | 0.744 | 7.10E-10 | 38.088 |
| 36 | Daytime sleepiness | rs147114641 | C | A | 0.008 | 0.001 | 0.774 | 1.70E-10 | 41.038 |
| 37 | Daytime sleepiness | rs62055936 | T | A | 0.008 | 0.001 | 0.777 | 4.40E-11 | 43.648 |
| 38 | Daytime sleepiness | rs2048522 | A | T | 0.006 | 0.001 | 0.565 | 3.50E-08 | 30.666 |

**Supplementary Table 7.** The summary information for instrumental variables of Insomnia.

| **Sort** | **Phenotype** | **SNP** | **effect_allele** | **other_allele** | **beta** | **se** | **eaf** | **pval** | **F-statistic** |
| --- | --- | --- | --- | --- | --- | --- | --- | --- | --- |
| 1 | Insomnia | rs4751 | G | T | -0.008 | 0.001 | 0.575 | 1.60E-08 | 30.613 |
| 2 | Insomnia | rs12405761 | A | C | 0.009 | 0.001 | 0.571 | 2.60E-11 | 43.644 |
| 3 | Insomnia | rs11804386 | G | A | -0.008 | 0.001 | 0.667 | 2.60E-08 | 30.283 |
| 4 | Insomnia | rs11184946 | C | T | -0.009 | 0.001 | 0.583 | 2.90E-10 | 39.407 |
| 5 | Insomnia | rs6664467 | G | A | 0.011 | 0.002 | 0.864 | 4.50E-08 | 31.240 |
| 6 | Insomnia | rs2644128 | C | G | -0.010 | 0.001 | 0.450 | 1.00E-12 | 49.281 |
| 7 | Insomnia | rs7572387 | A | C | -0.010 | 0.001 | 0.571 | 1.50E-12 | 49.218 |
| 8 | Insomnia | rs113851554 | G | T | -0.041 | 0.003 | 0.943 | 1.30E-41 | 181.158 |
| 9 | Insomnia | rs62158170 | A | G | 0.012 | 0.002 | 0.785 | 5.70E-13 | 51.282 |
| 10 | Insomnia | rs4577309 | A | G | 0.008 | 0.001 | 0.469 | 3.70E-09 | 34.191 |
| 11 | Insomnia | rs4688760 | C | T | -0.011 | 0.001 | 0.310 | 1.00E-12 | 51.564 |
| 12 | Insomnia | rs9845387 | C | A | 0.020 | 0.004 | 0.959 | 2.10E-08 | 31.506 |
| 13 | Insomnia | rs2100842 | T | G | -0.008 | 0.001 | 0.568 | 3.60E-08 | 30.409 |
| 14 | Insomnia | rs11097861 | A | G | -0.009 | 0.002 | 0.284 | 1.70E-09 | 35.641 |
| 15 | Insomnia | rs1430205 | C | T | -0.008 | 0.001 | 0.542 | 3.60E-08 | 30.596 |
| 16 | Insomnia | rs1592757 | G | C | -0.009 | 0.001 | 0.644 | 4.60E-10 | 39.194 |
| 17 | Insomnia | rs7711696 | G | T | -0.010 | 0.002 | 0.695 | 9.90E-12 | 45.975 |
| 18 | Insomnia | rs10947690 | A | G | -0.009 | 0.002 | 0.738 | 3.50E-08 | 30.464 |
| 19 | Insomnia | rs314280 | A | G | -0.009 | 0.001 | 0.453 | 3.50E-10 | 38.665 |
| 20 | Insomnia | rs4723649 | T | C | 0.008 | 0.001 | 0.421 | 1.10E-08 | 33.324 |
| 21 | Insomnia | rs6593005 | A | G | -0.009 | 0.002 | 0.259 | 8.60E-09 | 32.680 |
| 22 | Insomnia | rs10280045 | C | G | -0.009 | 0.001 | 0.427 | 1.00E-10 | 41.465 |
| 23 | Insomnia | rs17151854 | G | T | -0.011 | 0.002 | 0.847 | 2.40E-08 | 30.994 |
| 24 | Insomnia | rs10156602 | A | G | 0.010 | 0.001 | 0.638 | 3.40E-12 | 48.757 |
| 25 | Insomnia | rs2296580 | G | T | 0.010 | 0.002 | 0.702 | 8.70E-12 | 46.624 |
| 26 | Insomnia | rs2297787 | T | A | 0.015 | 0.003 | 0.921 | 2.10E-09 | 35.617 |
| 27 | Insomnia | rs10838708 | G | A | 0.008 | 0.001 | 0.541 | 2.50E-09 | 36.008 |
| 28 | Insomnia | rs324017 | A | C | 0.010 | 0.002 | 0.295 | 1.10E-10 | 40.577 |
| 29 | Insomnia | rs2956278 | A | G | -0.010 | 0.002 | 0.785 | 1.30E-08 | 31.953 |
| 30 | Insomnia | rs12424599 | A | G | -0.009 | 0.002 | 0.750 | 3.30E-09 | 34.743 |
| 31 | Insomnia | rs1923770 | T | A | 0.010 | 0.001 | 0.383 | 2.30E-12 | 48.964 |
| 32 | Insomnia | rs1327938 | T | C | -0.009 | 0.001 | 0.346 | 3.80E-10 | 38.658 |
| 33 | Insomnia | rs11635495 | T | C | -0.008 | 0.001 | 0.486 | 6.80E-09 | 34.425 |
| 34 | Insomnia | rs4886860 | G | C | 0.011 | 0.002 | 0.234 | 6.10E-12 | 47.363 |
| 35 | Insomnia | rs17139246 | T | C | -0.008 | 0.001 | 0.611 | 4.10E-08 | 29.594 |
| 36 | Insomnia | rs2062113 | T | C | 0.009 | 0.001 | 0.429 | 1.90E-10 | 40.220 |
| 37 | Insomnia | rs17669584 | A | G | -0.010 | 0.002 | 0.805 | 3.60E-08 | 29.241 |
| 38 | Insomnia | rs575346808 | T | A | -0.011 | 0.002 | 0.732 | 2.50E-11 | 45.301 |
| 39 | Insomnia | rs9894577 | G | A | -0.012 | 0.001 | 0.682 | 1.50E-16 | 69.090 |
| 40 | Insomnia | rs1942262 | G | A | -0.011 | 0.002 | 0.708 | 1.10E-13 | 53.614 |
| 41 | Insomnia | rs11673344 | A | G | -0.009 | 0.001 | 0.620 | 9.00E-10 | 36.945 |

**Supplementary Table 8.** The summary information for instrumental variables of Number of sleep episode.

| **Sort** | | **Phenotype** | **SNP** | **effect_allele** | **other_allele** | **beta** | **se** | **eaf** | **pval** | **F-statistic** |
| --- | --- | --- | --- | --- | --- | --- | --- | --- | --- | --- |
| 1 | Number of sleep episode | | rs12714404 | T | G | 0.135 | 0.019 | 0.283 | 1.70E-12 | 50.029 |
| 2 | Number of sleep episode | | rs310727 | T | C | 0.097 | 0.017 | 0.475 | 2.00E-08 | 31.647 |
| 3 | Number of sleep episode | | rs55754932 | A | C | -0.137 | 0.019 | 0.716 | 2.00E-12 | 50.617 |
| 4 | Number of sleep episode | | rs9864672 | T | C | 0.109 | 0.017 | 0.522 | 1.70E-10 | 39.640 |
| 5 | Number of sleep episode | | rs7377083 | C | A | -0.106 | 0.017 | 0.570 | 1.90E-09 | 36.446 |
| 6 | Number of sleep episode | | rs749100 | A | G | 0.121 | 0.017 | 0.582 | 5.30E-12 | 48.388 |
| 7 | Number of sleep episode | | rs35823995 | A | C | -0.209 | 0.034 | 0.924 | 1.10E-09 | 37.382 |
| 8 | Number of sleep episode | | rs9341399 | T | C | -0.242 | 0.035 | 0.064 | 1.00E-11 | 46.532 |
| 9 | Number of sleep episode | | rs1889978 | C | T | 0.100 | 0.017 | 0.485 | 5.00E-09 | 33.294 |
| 10 | Number of sleep episode | | rs6462892 | T | C | 0.098 | 0.017 | 0.478 | 9.40E-09 | 31.826 |
| 11 | Number of sleep episode | | rs10233848 | A | G | -0.128 | 0.019 | 0.707 | 1.40E-11 | 45.855 |
| 12 | Number of sleep episode | | rs1124116 | A | G | 0.114 | 0.019 | 0.730 | 3.20E-09 | 34.368 |
| 13 | Number of sleep episode | | rs4755731 | A | G | -0.103 | 0.017 | 0.569 | 3.20E-09 | 34.719 |
| 14 | Number of sleep episode | | rs3751837 | C | T | 0.123 | 0.021 | 0.781 | 4.10E-09 | 34.413 |
| 15 | Number of sleep episode | | rs8045740 | G | T | 0.194 | 0.026 | 0.868 | 5.80E-14 | 55.642 |
| 16 | Number of sleep episode | | rs11078916 | T | C | 0.106 | 0.019 | 0.279 | 2.60E-08 | 30.309 |
| 17 | Number of sleep episode | | rs11082030 | T | C | 0.110 | 0.019 | 0.725 | 8.40E-09 | 32.237 |
| 18 | Number of sleep episode | | rs8098424 | G | A | 0.098 | 0.018 | 0.619 | 2.20E-08 | 30.524 |
| 19 | Number of sleep episode | | rs76753486 | C | T | -0.174 | 0.031 | 0.916 | 2.00E-08 | 31.105 |
| 20 | Number of sleep episode | | rs429358 | T | C | 0.132 | 0.024 | 0.848 | 3.20E-08 | 30.236 |
| 21 | Number of sleep episode | | rs12479469 | G | A | -0.115 | 0.019 | 0.658 | 5.60E-10 | 38.723 |

**Supplementary Table 9.** The summary information for instrumental variables of Sleep efficiency.

| **Sort** | **Phenotype** | **SNP** | **effect_allele** | **other_allele** | **beta** | **se** | **eaf** | **pval** | **F-statistic** |
| --- | --- | --- | --- | --- | --- | --- | --- | --- | --- |
| 1 | Sleep efficiency | rs59483654 | C | T | 0.005 | 0.001 | 0.977 | 4.50E-06 | 20.847 |
| 2 | Sleep efficiency | rs150939397 | G | A | 0.004 | 0.001 | 0.954 | 1.90E-06 | 22.656 |
| 3 | Sleep efficiency | rs55722026 | C | T | 0.002 | 0.001 | 0.862 | 2.00E-06 | 22.380 |
| 4 | Sleep efficiency | rs113851554 | G | T | 0.008 | 0.001 | 0.943 | 4.90E-25 | 106.648 |
| 5 | Sleep efficiency | rs1820987 | C | T | -0.002 | 0.000 | 0.430 | 4.90E-07 | 25.399 |
| 6 | Sleep efficiency | rs62158160 | C | T | -0.002 | 0.000 | 0.743 | 2.70E-07 | 26.325 |
| 7 | Sleep efficiency | rs17400325 | T | C | 0.005 | 0.001 | 0.958 | 3.20E-10 | 39.109 |
| 8 | Sleep efficiency | rs10180073 | C | A | -0.002 | 0.000 | 0.600 | 4.30E-06 | 21.037 |
| 9 | Sleep efficiency | rs2442779 | C | T | 0.002 | 0.000 | 0.854 | 3.50E-06 | 21.712 |
| 10 | Sleep efficiency | rs13094687 | A | G | -0.002 | 0.000 | 0.685 | 9.10E-08 | 28.481 |
| 11 | Sleep efficiency | rs76372123 | T | G | 0.009 | 0.002 | 0.990 | 2.40E-06 | 22.324 |
| 12 | Sleep efficiency | rs13080973 | A | G | -0.002 | 0.000 | 0.798 | 3.40E-07 | 26.036 |
| 13 | Sleep efficiency | rs182096 | C | G | -0.003 | 0.001 | 0.893 | 5.80E-08 | 29.535 |
| 14 | Sleep efficiency | rs1422192 | G | A | 0.002 | 0.000 | 0.842 | 1.40E-06 | 23.192 |
| 15 | Sleep efficiency | rs10484380 | G | A | -0.003 | 0.001 | 0.904 | 3.00E-06 | 21.804 |
| 16 | Sleep efficiency | rs9369062 | A | C | -0.002 | 0.000 | 0.708 | 1.70E-07 | 27.367 |
| 17 | Sleep efficiency | rs11755292 | A | G | -0.007 | 0.001 | 0.982 | 3.00E-06 | 21.993 |
| 18 | Sleep efficiency | rs36172208 | C | T | -0.002 | 0.000 | 0.839 | 2.30E-06 | 22.330 |
| 19 | Sleep efficiency | rs73557392 | C | T | -0.004 | 0.001 | 0.940 | 4.90E-07 | 25.168 |
| 20 | Sleep efficiency | rs4737188 | A | T | 0.002 | 0.000 | 0.529 | 2.20E-07 | 26.773 |
| 21 | Sleep efficiency | rs72706534 | G | T | 0.003 | 0.001 | 0.939 | 3.70E-06 | 21.409 |
| 22 | Sleep efficiency | rs117415386 | G | A | -0.008 | 0.002 | 0.989 | 3.60E-06 | 21.477 |
| 23 | Sleep efficiency | rs148829139 | G | A | 0.005 | 0.001 | 0.971 | 4.70E-06 | 21.089 |
| 24 | Sleep efficiency | rs80045732 | G | T | 0.003 | 0.001 | 0.929 | 2.60E-06 | 21.906 |
| 25 | Sleep efficiency | rs12295166 | T | C | -0.002 | 0.000 | 0.624 | 2.80E-06 | 22.058 |
| 26 | Sleep efficiency | rs11217323 | A | C | 0.004 | 0.001 | 0.947 | 4.70E-06 | 20.945 |
| 27 | Sleep efficiency | rs80308939 | C | T | -0.004 | 0.001 | 0.956 | 2.70E-06 | 21.834 |
| 28 | Sleep efficiency | rs138877611 | A | G | -0.007 | 0.002 | 0.984 | 4.00E-06 | 21.230 |
| 29 | Sleep efficiency | rs4887349 | C | T | 0.004 | 0.001 | 0.051 | 4.90E-06 | 20.707 |
| 30 | Sleep efficiency | rs79993873 | A | C | -0.004 | 0.001 | 0.945 | 3.60E-06 | 21.345 |
| 31 | Sleep efficiency | rs4387634 | C | T | 0.002 | 0.000 | 0.847 | 2.60E-06 | 21.947 |
| 32 | Sleep efficiency | rs45499393 | C | T | -0.006 | 0.001 | 0.978 | 2.10E-06 | 22.563 |
| 33 | Sleep efficiency | rs78413726 | G | C | -0.006 | 0.001 | 0.973 | 6.70E-07 | 24.850 |
| 34 | Sleep efficiency | rs9941763 | G | A | -0.002 | 0.000 | 0.615 | 3.20E-06 | 21.656 |
| 35 | Sleep efficiency | rs9608642 | C | A | -0.002 | 0.000 | 0.600 | 9.90E-07 | 23.900 |

**Supplementary Table 10.** The summary information for instrumental variables of RBD.

| **Sort** | Phenotype | SNP | effect_allele | other_allele | beta | se | eaf | pval | F-statistic |
| --- | --- | --- | --- | --- | --- | --- | --- | --- | --- |
| 1 | RBD | rs3756059 | A | G | 0.401 | 0.049 | 0.496 | 2.42E-16 | 67.216 |
| 2 | RBD | rs189954564 | G | C | 1.630 | 0.283 | 0.004 | 7.99E-09 | 33.270 |
| 3 | RBD | rs146507933 | T | C | 2.259 | 0.417 | 0.003 | 6.21E-08 | 29.290 |
| 4 | RBD | rs16947905 | A | G | 0.491 | 0.092 | 0.053 | 8.36E-08 | 28.714 |
| 5 | RBD | rs191280681 | G | A | 1.166 | 0.221 | 0.009 | 1.28E-07 | 27.891 |
| 6 | RBD | rs192260324 | G | A | 1.736 | 0.330 | 0.004 | 1.43E-07 | 27.680 |
| 7 | RBD | rs376489951 | T | G | 1.421 | 0.277 | 0.004 | 2.88E-07 | 26.325 |
| 8 | RBD | rs76917400 | G | A | 0.441 | 0.086 | 0.081 | 2.94E-07 | 26.282 |
| 9 | RBD | rs112506767 | C | T | 1.249 | 0.244 | 0.008 | 2.97E-07 | 26.266 |
| 10 | RBD | rs112927259 | C | T | 1.093 | 0.216 | 0.009 | 4.11E-07 | 25.635 |
| 11 | RBD | rs142735667 | A | G | 0.947 | 0.188 | 0.011 | 5.10E-07 | 25.220 |
| 12 | RBD | rs71456122 | A | G | 0.901 | 0.180 | 0.017 | 5.40E-07 | 25.109 |
| 13 | RBD | rs73157595 | C | T | 0.767 | 0.154 | 0.018 | 6.36E-07 | 24.793 |
| 14 | RBD | rs360284 | A | G | 0.693 | 0.139 | 0.050 | 6.38E-07 | 24.788 |
| 15 | RBD | rs140857507 | A | G | 1.025 | 0.206 | 0.011 | 6.40E-07 | 24.782 |
| 16 | RBD | rs274759 | T | G | -0.432 | 0.087 | 0.136 | 6.41E-07 | 24.779 |
| 17 | RBD | rs11622216 | C | A | 0.255 | 0.052 | 0.295 | 7.76E-07 | 24.411 |
| 18 | RBD | rs13022991 | A | G | 0.334 | 0.068 | 0.130 | 8.23E-07 | 24.297 |
| 19 | RBD | rs148224267 | G | C | -0.332 | 0.067 | 0.194 | 8.65E-07 | 24.202 |
| 20 | RBD | rs114060722 | A | G | 0.849 | 0.174 | 0.011 | 1.01E-06 | 23.895 |
| 21 | RBD | rs4641471 | T | C | 0.276 | 0.057 | 0.229 | 1.11E-06 | 23.726 |
| 22 | RBD | rs365605 | C | T | 0.238 | 0.049 | 0.336 | 1.18E-06 | 23.604 |
| 23 | RBD | rs78433421 | A | G | 0.743 | 0.153 | 0.019 | 1.22E-06 | 23.546 |
| 24 | RBD | rs116509380 | T | C | 0.975 | 0.201 | 0.012 | 1.30E-06 | 23.420 |
| 25 | RBD | rs79297179 | T | C | 0.788 | 0.163 | 0.025 | 1.32E-06 | 23.382 |
| 26 | RBD | rs139948796 | G | A | 1.231 | 0.255 | 0.005 | 1.35E-06 | 23.339 |
| 27 | RBD | rs73093704 | C | T | 0.697 | 0.145 | 0.018 | 1.44E-06 | 23.216 |
| 28 | RBD | rs79864715 | C | T | 1.338 | 0.278 | 0.008 | 1.55E-06 | 23.085 |
| 29 | RBD | rs7519408 | G | C | 0.328 | 0.068 | 0.128 | 1.55E-06 | 23.083 |
| 30 | RBD | rs139150608 | A | G | 1.143 | 0.238 | 0.006 | 1.62E-06 | 22.992 |
| 31 | RBD | rs11585102 | A | C | 0.657 | 0.137 | 0.038 | 1.74E-06 | 22.860 |
| 32 | RBD | rs6785147 | C | G | 0.657 | 0.138 | 0.023 | 1.77E-06 | 22.826 |
| 33 | RBD | rs142239059 | A | G | 0.901 | 0.189 | 0.012 | 1.85E-06 | 22.742 |
| 34 | RBD | rs149525467 | G | A | 0.722 | 0.153 | 0.017 | 2.36E-06 | 22.271 |
| 35 | RBD | rs149586975 | A | C | 0.561 | 0.119 | 0.034 | 2.49E-06 | 22.168 |
| 36 | RBD | rs79286193 | A | G | 0.836 | 0.178 | 0.016 | 2.59E-06 | 22.094 |
| 37 | RBD | rs114106519 | C | T | 0.967 | 0.206 | 0.010 | 2.67E-06 | 22.035 |
| 38 | RBD | rs7179187 | C | T | 0.223 | 0.048 | 0.486 | 2.85E-06 | 21.909 |
| 39 | RBD | rs4701532 | A | G | 0.249 | 0.053 | 0.252 | 2.96E-06 | 21.836 |
| 40 | RBD | rs113568427 | A | G | 1.261 | 0.270 | 0.005 | 3.06E-06 | 21.773 |
| 41 | RBD | rs562579670 | T | C | 1.872 | 0.402 | 0.003 | 3.17E-06 | 21.705 |
| 42 | RBD | rs4785910 | A | G | 0.319 | 0.069 | 0.170 | 3.35E-06 | 21.599 |
| 43 | RBD | rs115284053 | T | C | 0.541 | 0.117 | 0.041 | 3.64E-06 | 21.441 |
| 44 | RBD | rs144112322 | G | A | 1.070 | 0.231 | 0.010 | 3.77E-06 | 21.373 |
| 45 | RBD | rs76485411 | A | G | 0.560 | 0.121 | 0.028 | 3.86E-06 | 21.331 |
| 46 | RBD | rs113356890 | C | G | 0.377 | 0.082 | 0.080 | 4.18E-06 | 21.178 |
| 47 | RBD | rs74053824 | A | C | 0.851 | 0.185 | 0.010 | 4.21E-06 | 21.164 |
| 48 | RBD | rs113973820 | A | G | 0.962 | 0.209 | 0.018 | 4.32E-06 | 21.115 |
| 49 | RBD | rs3775144 | T | C | 0.433 | 0.094 | 0.054 | 4.34E-06 | 21.104 |
| 50 | RBD | rs2903455 | G | A | 0.297 | 0.065 | 0.158 | 4.84E-06 | 20.897 |

**Abbreviations**: Rapid-eye-movement sleep behavior disorder.

**Supplementary Table 11.** The summary information for instrumental variables of Delirium.

| **Sort** | **Phenotype** | **SNP** | **effect_allele** | **other_allele** | **beta** | **se** | **eaf** | **pval** | **F-statistic** |
| --- | --- | --- | --- | --- | --- | --- | --- | --- | --- |
| 1 | Delirium | rs77833655 | C | T | -0.329 | 0.071 | 0.033 | 3.77E-06 | 21.379 |
| 2 | Delirium | rs6661783 | G | A | -0.190 | 0.039 | 0.110 | 1.06E-06 | 23.809 |
| 3 | Delirium | rs61763023 | T | C | 0.223 | 0.049 | 0.054 | 4.607E-06 | 20.995 |
| 4 | Delirium | rs1831043 | C | T | 0.111 | 0.024 | 0.624 | 4.51E-06 | 21.036 |
| 5 | Delirium | rs12769722 | C | T | 0.136 | 0.024 | 0.325 | 2.34E-08 | 31.189 |
| 6 | Delirium | rs72888179 | T | C | -0.196 | 0.039 | 0.107 | 6.84E-07 | 24.659 |
| 7 | Delirium | rs77490325 | C | T | -0.711 | 0.147 | 0.010 | 1.21E-06 | 23.561 |
| 8 | Delirium | rs429358 | T | C | 0.454 | 0.029 | 0.177 | 4.46E-56 | 248.921 |
| 9 | Delirium | rs9612887 | T | C | -0.111 | 0.024 | 0.387 | 3.72E-06 | 21.405 |

**Supplementary Table 12.** The F statistic for each exposure.

| **Exposure** | **Samplesize** | **No. of IVs** | **R2** | **F-statistic** |
| --- | --- | --- | --- | --- |
|
| Chronotype | 403195 | 152 | 0.018 | 49 (28-209) |
| Daytime napping | 452633 | 103 | 0.011 | 47 (30-217) |
| Daytime sleepiness | 452071 | 38 | 0.004 | 42 (30-117) |
| Insomnia | 453379 | 41 | 0.004 | 43 (29-181) |
| Long sleep duration | 339926 | 10 | 0.001 | 40 (30-53) |
| Number of sleep episodes | 84810 | 21 | 0.009 | 39 (30-56) |
| Short sleep duration | 411934 | 26 | 0.002 | 37 (30-77) |
| RBD | 9447 | 50 | 0.130 | 28 (21-67) |
| Sleep duration | 446118 | 70 | 0.006 | 41 (30-221) |
| Sleep efficiency | 84810 | 35 | 0.011 | 26 (21-107) |
| Delirium | 431880 | 9 | 0.001 | 49 (21-249) |

**Abbreviations**: IVs, instrumental variables;

**Supplementary Table 13.** Heterogeneity and horizontal multiplicity test results before and after outlier removal.

| **Exposure** | | **Outcome** | **Method** | **Q-Pval** | **Egger_intercept**  **-Pval** | **MR_PRESSO** | | **Q-Pval*** | **Egger_intercept**  **-Pval*** | **MR_PRESSO**  **-Pval*** |
| --- | --- | --- | --- | --- | --- | --- | --- | --- | --- | --- |
| **Global test-Pval** | **Outliers** |
| Chronotype | | Delirium | IVW | 0.101 | 0.850 | 0.090 | NA | 0.101 | 0.850 | 0.105 |
| Daytime napping | | IVW | 0.543 | 0.692 | 0.556 | NA | 0.543 | 0.692 | 0.550 |
| Daytime sleepiness | | IVW | 0.23 | 0.826 | 0.234 | NA | 0.230 | 0.826 | 0.240 |
| Insomnia | | IVW | **0.029** | 0.856 | **0.023** | rs7711696 | 0.211 | 0.757 | 0.216 |
| Long sleep duration | | IVW | 0.762 | 0.948 | 0.734 | NA | 0.762 | 0.948 | 0.742 |
| Number of sleep episodes | | IVW | **<0.001** | 0.620 | **<0.001** | rs429358 | 0.713 | 0.617 | 0.716 |
| Short sleep duration | | IVW | **0.016** | 0.232 | **0.024** | rs4585442 | 0.186 | 0.222 | 0.193 |
| RBD | | IVW | 0.839 | 0.462 | 0.841 | NA | 0.839 | 0.462 | 0.792 |
| Sleep duration | | IVW | 0.115 | 0.976 | 0.112 | NA | 0.115 | 0.976 | 0.142 |
| Sleep efficiency | | IVW | 0.617 | 0.076 | 0.63 | NA | 0.617 | 0.076 | 0.626 |
| Delirium | Chronotype | | IVW | 0.545 | 0.259 | 0.425 | NA | 0.545 | 0.259 | 0.434 |
| Daytime napping | | IVW | **0.001** | 0.226 | **0.030** | rs1831043; rs429358 | 0.276 | 0.626 | 0.318 |
| Daytime sleepiness | | IVW | 0.651 | 0.858 | 0.562 | NA | 0.651 | 0.858 | 0.560 |
| Long sleep duration | | IVW | 0.307 | 0.579 | 0.327 | NA | 0.307 | 0.579 | 0.299 |
| Number of sleep episodes | | IVW | **0.011** | 0.064 | 0.058 | rs429358 | 0.849 | 0.406 | 0.786 |
| Short sleep duration | | IVW | **0.017** | 0.543 | 0.061 | NA | **0.017** | 0.543 | 0.058 |
| RBD | | IVW | 0.876 | 0.800 | 0.907 | NA | 0.876 | 0.800 | 0.897 |
| Sleep duration | | IVW | **0.048** | 0.753 | 0.097 | NA | **0.048** | 0.753 | 0.109 |
| Sleep efficiency | | IVW | 0.363 | 0.909 | 0.495 | NA | 0.363 | 0.909 | 0.492 |

**Abbreviations**: *, Outlier removed test results

**Supplementary Figure 1.** STROBE-MR checklist of recommended items to address in reports of Mendelian randomization studies 1,2

| **Item No.** | **Section** | **Checklist item** | **Page No.** | **Relevant text from manuscript** |
| --- | --- | --- | --- | --- |
| 1 | **TITLE and ABSTRACT** | Indicate Mendelian randomization (MR) as the study’s design in the title and/or the abstract if that is a main purpose of the study | 1-2 | Causal Associations between Sleep Traits and Delirium: A Bidirectional Two-Sample Mendelian Randomization Study |
|  | **INTRODUCTION** |  |  |  |
| 2 | **Background** | Explain the scientific background and rationale for the reported study. What is the exposure? Is a potential causal relationship between exposure and outcome plausible? Justify why MR is a helpful method to address the study question | 5-6 | Delirium is a cognitive disorder characterized by sudden, fluctuating disturbances in attention and awareness. Postoperative delirium typically manifests between the second and fifth postoperative days. Although it occurs in only 2–3% of the general surgical population, it has been reported in up to 50–70% of high-risk patient groups. It is considered a significant health concern due to its potential to cause various short-term and long-term negative effects. It affects not only the patients' cognitive function and quality of life but is also associated to significantly higher morbidity and mortality.  Although the etiology of delirium is not well known, evidence suggests a possible association between sleep disorders and delirium. Sleep quality and disruptions are currently receiving significant interest in the field of delirium research. The sleep patterns of individuals with delirium are characterized by short duration of rapid eye movement sleep and poor quality of sleep. Evidence indicates that individuals with a history of sleep disorders have a fivefold increased risk of experiencing postoperative delirium compared to those without such conditions. By synthesizing the results of numerous studies demostrated significant associations between certain sleep traits and delirium and suggested that sleep disturbances could be a modifiable risk factor for delirium. Additionally, since sleep disorders often coexist with delirium and share common pathophysiological pathways and mechanisms, it remains unclear whether sleep disturbances are a cause of delirium or a consequence. Some researchers believe that the relationship between sleep and delirium is bidirectional. Nevertheless, due to lack of specific sleep trait categorizations and the susceptibility of published studies to confounding variables, elucidating the causal association between sleep and delirium remains challenging. Conducting extensive randomized trials that encompass all categories of sleep traits in real-world settings is equally challenging. |
| 3 | **Objectives** | State specific objectives clearly, including pre-specified causal hypotheses (if any). State that MR is a method that, under specific assumptions, intends to estimate causal effects | 6-7 | We therefore used MR to assess the causal relationship between ten sleep traits and delirium, including chronotype, sleep duration, long sleep duration, short sleep duration, daytime napping, daytime sleepiness, insomnia, number of sleep episodes, sleep efficiency, and rapid-eye-movement sleep behavior disorder (RBD). |
|  | **METHODS** |  |  |  |
| 4 | **Study design and data sources** | Present key elements of the study design early in the article. Consider including a table listing sources of data for all phases of the study. For each data source contributing to the analysis, describe the following: | 8-9 | The METHOD section of our manuscript details the detailed characterization of each GWAS data. Detailed data sources are summarized in Table1 |
|  | a) | Setting: Describe the study design and the underlying population, if possible. Describe the setting, locations, and relevant dates, including periods of recruitment, exposure, follow-up, and data collection, when available. |  |  |
|  | b) | Participants: Give the eligibility criteria, and the sources and methods of selection of participants. Report the sample size, and whether any power or sample size calculations were carried out prior to the main analysis |  |  |
|  | c) | Describe measurement, quality control and selection of genetic variants |  |  |
|  | d) | For each exposure, outcome, and other relevant variables, describe methods of assessment and diagnostic criteria for diseases |  |  |
|  | e) | Provide details of ethics committee approval and participant informed consent, if relevant |  |  |
| 5 | **Assumptions** | Explicitly state the three core IV assumptions for the main analysis (relevance, independence and exclusion restriction) as well assumptions for any additional or sensitivity analysis | 9-10 | We rigorously selected IVs following the steps below. Initially, single nucleotide polymorphisms (SNPs) significantly associated with exposure (significance threshold: p < 5×10-8) were selected. To prevent co-linearity among SNPs, we established the linkage disequilibrium threshold (r2) at 0.001, and ensured independence of each SNP by setting the clumping window to 10 MB 26. If the number of SNPs examined was insufficient, we modified the threshold to p < 5×10-6. The F-statistic was then employed to evaluate the strength of association between the IVs and the exposure. IVs were considered robust and MR results unlikely to be affected by weak IV when F statistic is greater than 10. Conversely, IVs were excluded if the F statistic is less than 10. Then, We utilized online data from the GWAS Catalog and the LDlink dataset to remove SNPs associated with confounding factors such as neuroticism, diabetes, and cognitive impairment. Finally, we harmonized the data between SNPexposure and SNPoutcome. |
| 6 | **Statistical methods: main analysis** | Describe statistical methods and statistics used | 10-11 | A two-sample MR analysis was conducted to assess the causal relationship between sleep traits and delirium. The MR analyses primarily employed inverse variance weighting (IVW) to assess causality. Additionally, MR Egger and WM was utilized as a complementary analytical approaches to assess the consistency of the causal estimates. IVW is characterized by omitting the intercept term and weighting the data by the inverse of the outcome variance to optimize the fit. In contrast to IVW, MR Egger includes an intercept term in its regression model while also weighting data by the inverse of the outcome variance to improve the fit. WM calculates the median effect estimate of the distribution function by ranking all SNP effect values based on their weights. It offers robust estimates of causal effects, even when up to 50% of the IVs are null. For inference of final causal inferences, it is necessary to satisfy the p < 0.05 in the IVW test along with the following conditions: (1) Either MR Egger or WM test shows a p < 0.05. (2) the ORs of the IVW and the WM consistently indicate that the effect is in the same direction. (3) No statistically significant evidence of horizontal pleiotropy is detected (p > 0.05). (4) In the leave-one-out analysis, all error bars consistently remained on one side of zero. (5) These criteria remain valid even after adjusting for heterogeneity. At last, the P value of the IVW was modified by considering the false detection rate (FDR) |
|  | a) | Describe how quantitative variables were handled in the analyses (i.e., scale, units, model) |  |  |
|  | b) | Describe how genetic variants were handled in the analyses and, if applicable, how their weights were selected |  |  |
|  | c) | Describe the MR estimator (e.g. two-stage least squares, Wald ratio) and related statistics. Detail the included covariates and, in case of two-sample MR, whether the same covariate set was used for adjustment in the two samples |  |  |
|  | d) | Explain how missing data were addressed |  |  |
|  | e) | If applicable, indicate how multiple testing was addressed |  |  |
| 7 | **Assessment of assumptions** | Describe any methods or prior knowledge used to assess the assumptions or justify their validity | 9-10 | the F statistic was used to assess the association strength between the IVs and the exposure. We considered the IVs robust and MR results were unlikely to be affected by weak IV When F statistic is greater than 10. Similarly, we should exclude the IVs if the F statistic falls below 10. |
| 8 | **Sensitivity analyses and additional analyses** | Describe any sensitivity analyses or additional analyses performed (e.g. comparison of effect estimates from different approaches, independent replication, bias analytic techniques, validation of instruments, simulations) | 11-12 | To assess potential violations of the MR assumptions, we conducted sensitivity analyses using Cochran's Q test, MR-Egger intercept, MR PRESSO test, and leave-one-out method to evaluate the stability and reliability of the results. We used Cochran's Q test to assess the degree of heterogeneity. When significant heterogeneity was detected, a random effects model was used; otherwise, a fixed effects model was applied 34. The MR-Egger intercept and MR PRESSO test were used to assess the presence of horizontal pleiotropy, while the MR PRESSO global was used to identify potential outliers. If the test results indicated the presence of horizontal pleiotropy or outliers, we adjusted the MR analysis by excluding the outliers. Finally, a leave-one-out analysis was conducted to remove each SNP individually to assess the combined effect of the remaining SNPs. All error lines consistently remained on the side of zero, indicating the results were reliable. |
| 9 | **Software and pre-registration** |  |  |  |
|  | a) | Name statistical software and package(s), including version and settings used | 11 | All analyses were conducted using R software (version 4.4.0) incorporating the TwoSampleMR and MR-PRESSO packages. |
|  | b) | State whether the study protocol and details were pre-registered (as well as when and where) |  | This study did not register a research protocol. |
|  | **RESULTS** |  |  |  |
| 10 | **Descriptive data** |  |  |  |
|  | a) | Report the numbers of individuals at each stage of included studies and reasons for exclusion. Consider use of a flow diagram | 9 | The number of participants in the sample is  provided in the Methods section of this paper; consequently, it is not reiterated in the Results section. |
|  | b) | Report summary statistics for phenotypic exposure(s), outcome(s), and other relevant variables (e.g. means, SDs, proportions) | Tables 1, Supplement Table 1-11 | Tables 1, Supplement Table 1-11 present a detailed summary of the summary statistics for phenotypic exposures and outcomes. |
|  | c) | If the data sources include meta-analyses of previous studies, provide the assessments of heterogeneity across these studies | / | / |
|  | d) | For two-sample MR:  i.  Provide justification of the similarity of the genetic variant-exposure associations between the exposure and outcome samples  ii.  Provide information on the number of individuals who overlap between the exposure and outcome studies |  | i. All the sample populations in this study originate from Europe, thus exhibiting minimal ethnic heterogeneity.  ii. The exposure and outcome populations investigated in this study are sourced from different databases, thereby avoiding potential biases caused by sample overlap. |
| 11 | **Main results** |  |  |  |
|  | a) | Report the associations between genetic variant and exposure, and between genetic variant and outcome, preferably on an interpretable scale | 13 | This article reports the content of this entry in Tables S1-S12 of the "Supplementary Material", including the number of instrumental variable SNPs, specific information about the SNPs, the association strength between the exposure and instrumental variables, and the association strength between the outcome and instrumental variables. |
|  | b) | Report MR estimates of the relationship between exposure and outcome, and the measures of uncertainty from the MR analysis, on an interpretable scale, such as odds ratio or relative risk per SD difference | 13-14, Figures 2 and 3 | Delirium may be a risk factor for morning chronotype when used as an exposure [ORIVW, 1.025; 95%CI, 1.012-1.036; P = 1.50E-05; adjusted p values (Padjusted )= 1.35E-04]. In contrast, the results of delirium on long sleep duration were not statistically significant after adjustment [ORIVW, 0.996; 95%CI, 0.993-0.999; P = 0.013; Padjusted= 0.059] (Figure 3). Furthermore, when estimating the effect of delirium on insomnia, we did not find an outcome variable corresponding to the IV for delirium. Finally, we did not find a causal relationship between delirium and the remaining sleep traits. (Figure 3, Supplementary Figures S5-S7). |
|  | c) | If relevant, consider translating estimates of relative risk into absolute risk for a meaningful time period | 13-14 | This study continues to use relative risk for causal assessment. |
|  | d) | Consider plots to visualize results (e.g. forest plot, scatterplot of associations between genetic variants and outcome versus between genetic variants and exposure) | Figure 2-4, supplementary material: Figure 1-7 | Forest plots and scatter plots can be found  : in Figures 2-4, as well  as in supplementary material Figures 1-  7. |
| 12 | **Assessment of assumptions** |  |  |  |
|  | a) | Report the assessment of the validity of the assumptions | 9-11 | We rigorously selected IVs following the steps below. Initially, single nucleotide polymorphisms (SNPs) significantly associated with exposure (significance threshold: p < 5×10-8) were selected. To prevent co-linearity among SNPs, we established the linkage disequilibrium threshold (r2) at 0.001, and ensured independence of each SNP by setting the clumping window to 10 MB 26. If the number of SNPs examined was insufficient, we modified the threshold to p < 5×10-6. The F-statistic was then employed to evaluate the strength of association between the IVs and the exposure. IVs were considered robust and MR results unlikely to be affected by weak IV when F statistic is greater than 10. Conversely, IVs were excluded if the F statistic is less than 10. Then, We utilized online data from the GWAS Catalog and the LDlink dataset to remove SNPs associated with confounding factors such as neuroticism, diabetes, and cognitive impairment. Finally, we harmonized the data between SNPexposure and SNPoutcome. |
|  | b) | Report any additional statistics (e.g., assessments of heterogeneity across genetic variants, such as *I2*, Q statistic or E-value) | 14 | we conducted sensitivity analyses using Cochran's Q test. |
| 13 | **Sensitivity analyses and additional analyses** |  |  |  |
|  | a) | Report any sensitivity analyses to assess the robustness of the main results to violations of the assumptions | 14 | We observed significant heterogeneity in the effects of insomnia, NSE, and short sleep duration on delirium. Similarly, reverse MR analysis revealed substantial heterogeneity in the impact of delirium on daytime napping, NSE, short sleep duration, and sleep duration (Q-Pval < 0.05). The MR-Egger intercept test did not detect horizontal pleiotropy; however, the MR-PRESSO test detected significant horizontal pleiotropy between insomnia, the NSE, short sleep duration, and delirium, as well as between delirium and daytime napping. Therefore, we reanalyzed after removing the outlier SNPs detected: rs7711696, rs429358, rs4585442, and rs1831043—which effectively mitigated pleiotropy and heterogeneity (Supplementary material: Table 14). Furthermore, we performed leave-one-out analyses, displaying the results in Figure 4 and Supplementary material: Figures 1-7. |
|  | b) | Report results from other sensitivity analyses or additional analyses | Figure 4, Supplement material: Figure 1-7 | we conducted leave-one-out analyses, displaying the results in Figure 4 and Supplementary Figures 1-7. |
|  | c) | Report any assessment of direction of causal relationship (e.g., bidirectional MR) | 13 | This study is a bidirectional two-sample Mendelian Randomization analysis. The results section not only provides a detailed report on the evaluation of the bidirectional MR analysis but also organizes the relevant detailed data in the supplementary materials |
|  | d) | When relevant, report and compare with estimates from non-MR analyses | Figure 4, Figure S1-S7 | We conducted a comprehensive discussion of the MR analysis results and their correlation with observational studies and disease mechanisms in the discussion section. |
|  | e) | Consider additional plots to visualize results (e.g., leave-one-out analyses) | Figure 4, Supplement material: Figure 1-7 | we conducted leave-one-out analyses, displaying the results in Figure 4 and Supplementary Figures 1-7. |
|  | **DISCUSSION** |  |  |  |
| 14 | **Key results** | Summarize key results with reference to study objectives | 15 | Gene prediction results indicated that none of the ten sleep traits were risk factors for delirium, but rather, delirium may increase the risk of morning chronotype and decrease the risk of long sleep duration. |
| 15 | **Limitations** | Discuss limitations of the study, taking into account the validity of the IV assumptions, other sources of potential bias, and imprecision. Discuss both direction and magnitude of any potential bias and any efforts to address them | 18 | There are some limitations to our study. Firstly, we need to further investigate whether we can extrapolate the results of our analyses to populations of other origins, given that the GWAS datasets are all of European origin. Second, this study primarily obtained the GWAS data for some sleep traits through self-reported questionnaires rather than objective measurements, which could potentially bias the results. |
| 16 | **Interpretation** |  |  |  |
|  | a) | Meaning: Give a cautious overall interpretation of results in the context of their limitations and in comparison with other studies | 15-16 | Overall, our bidirectional two-sample MR analysis study did not find direct evidence that sleep traits increase the risk of delirium, which is contrary to the results of previous related studies. At the same time, we speculate whether sleep could indirectly increase the risk of delirium through factors such as depression, frailty index, and gut flora. |
|  | b) | Mechanism: Discuss underlying biological mechanisms that could drive a potential causal relationship between the investigated exposure and the outcome, and whether the gene-environment equivalence assumption is reasonable. Use causal language carefully, clarifying that IV estimates may provide causal effects only under certain assumptions | 16-17 | we speculate whether sleep could indirectly increase the risk of delirium through factors such as depression, frailty index, and gut flora. |
|  | c) | Clinical relevance: Discuss whether the results have clinical or public policy relevance, and to what extent they inform effect sizes of possible interventions | 17 | Gene prediction results indicated that none of the ten sleep traits were risk factors for delirium, but rather, delirium may increase the risk of morning chronotype and decrease the risk of long sleep duration. our bidirectional two-sample MR analysis study did not find direct evidence that sleep traits increase the risk of delirium, which is contrary to the results of previous related studies. At the same time, we speculate whether sleep could indirectly increase the risk of delirium through factors such as depression, frailty index, and gut flora. |
| 17 | **Generalizability** | Discuss the generalizability of the study results (a) to other populations, (b) across other exposure periods/timings, and (c) across other levels of exposure | 18 | we need to further investigate whether we can extrapolate the results of our analyses to populations of other origins, given that the GWAS datasets are all of European origin. |
|  | **OTHER INFORMATION** |  |  |  |
| 18 | **Funding** | Describe sources of funding and the role of funders in the present study and, if applicable, sources of funding for the databases and original study or studies on which the present study is based | 22 | This work was supported by National Natural Science Foundation of China (82074357); Guangzhou Municipal Science and Technology Bureau (202201010812). |
| 19 | **Data and data sharing** | Provide the data used to perform all analyses or report where and how the data can be accessed, and reference these sources in the article. Provide the statistical code needed to reproduce the results in the article, or report whether the code is publicly accessible and if so, where | 20 | The complete data and GWAS data sources are available in the article/Supplementary Materials. If you need additional data, please contact the corresponding author. |
| 20 | **Conflicts of Interest** | All authors should declare all potential conflicts of interest | 24 | The authors state that the research was conducted in the absence of any commercial or financial relationship that could be construed as a potential conflict of interest. |

This checklist is copyrighted by the Equator Network under the Creative Commons Attribution 3.0 Unported (CC BY 3.0) license.

1. Skrivankova VW, Richmond RC, Woolf BAR, et al. Strengthening the reporting of observational studies in epidemiology u sing mendelian randomisation (STROBE-MR): explanation and elaboration. *BMJ (Clinical research ed)*. 2021/10/26/ 375:n2233. doi:10.1136/bmj.n2233

2. Skrivankova VW, Richmond RC, Woolf BAR, et al. Strengthening the Reporting of Observational Studies in Epidemiology Using Mendelian Randomization: The STROBE-MR Statement. *Jama*. Oct 26 2021;326(16):1614-1621. doi:10.1001/jama.2021.18236

**Supplementary Figure 2. Forest plot (A) Scatter plot of the MR analysis and Leave-one-out sensitivity analysis of the effect of Chronotype on Delirium; (B) Scatter plot of the MR analysis and Leave-one-out sensitivity analysis of the effect of Sleep duration on Delirium; (C) Scatter plot of the MR analysis and Leave-one-out sensitivity analysis of the effect of Short sleep duration on Delirium.**


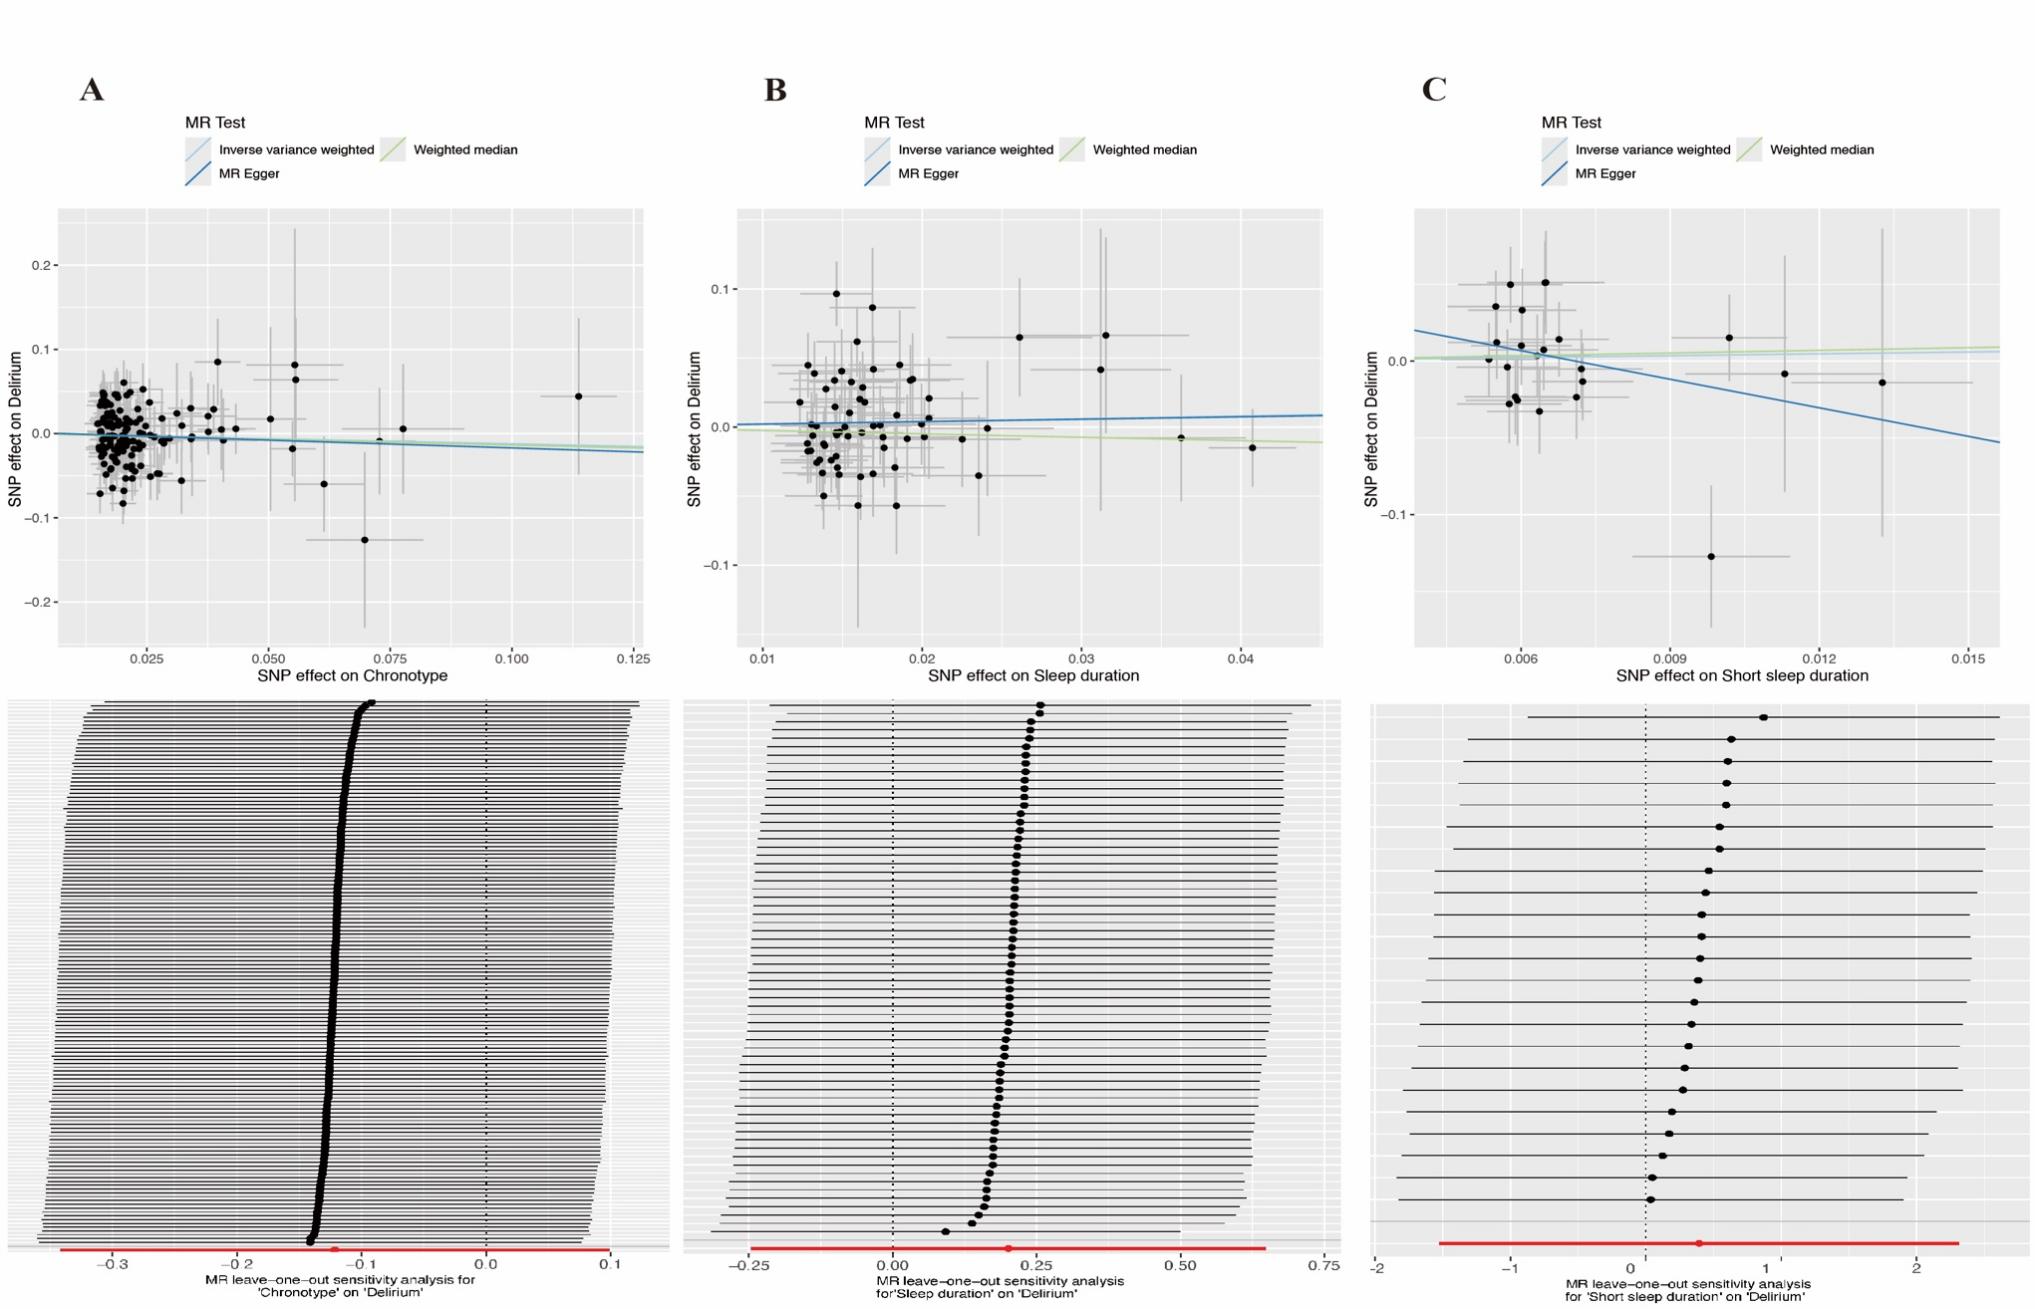


**Supplementary Figure 3. Forest plot (A) Scatter plot of the MR analysis and Leave-one-out sensitivity analysis of the effect of Long sleep duration on Delirium; (B) Scatter plot of the MR analysis and Leave-one-out sensitivity analysis of the effect of Daytime napping on Delirium; (C) Scatter plot of the MR analysis and Leave-one-out sensitivity analysis of the effect of Daytime sleepiness on Delirium.**

**
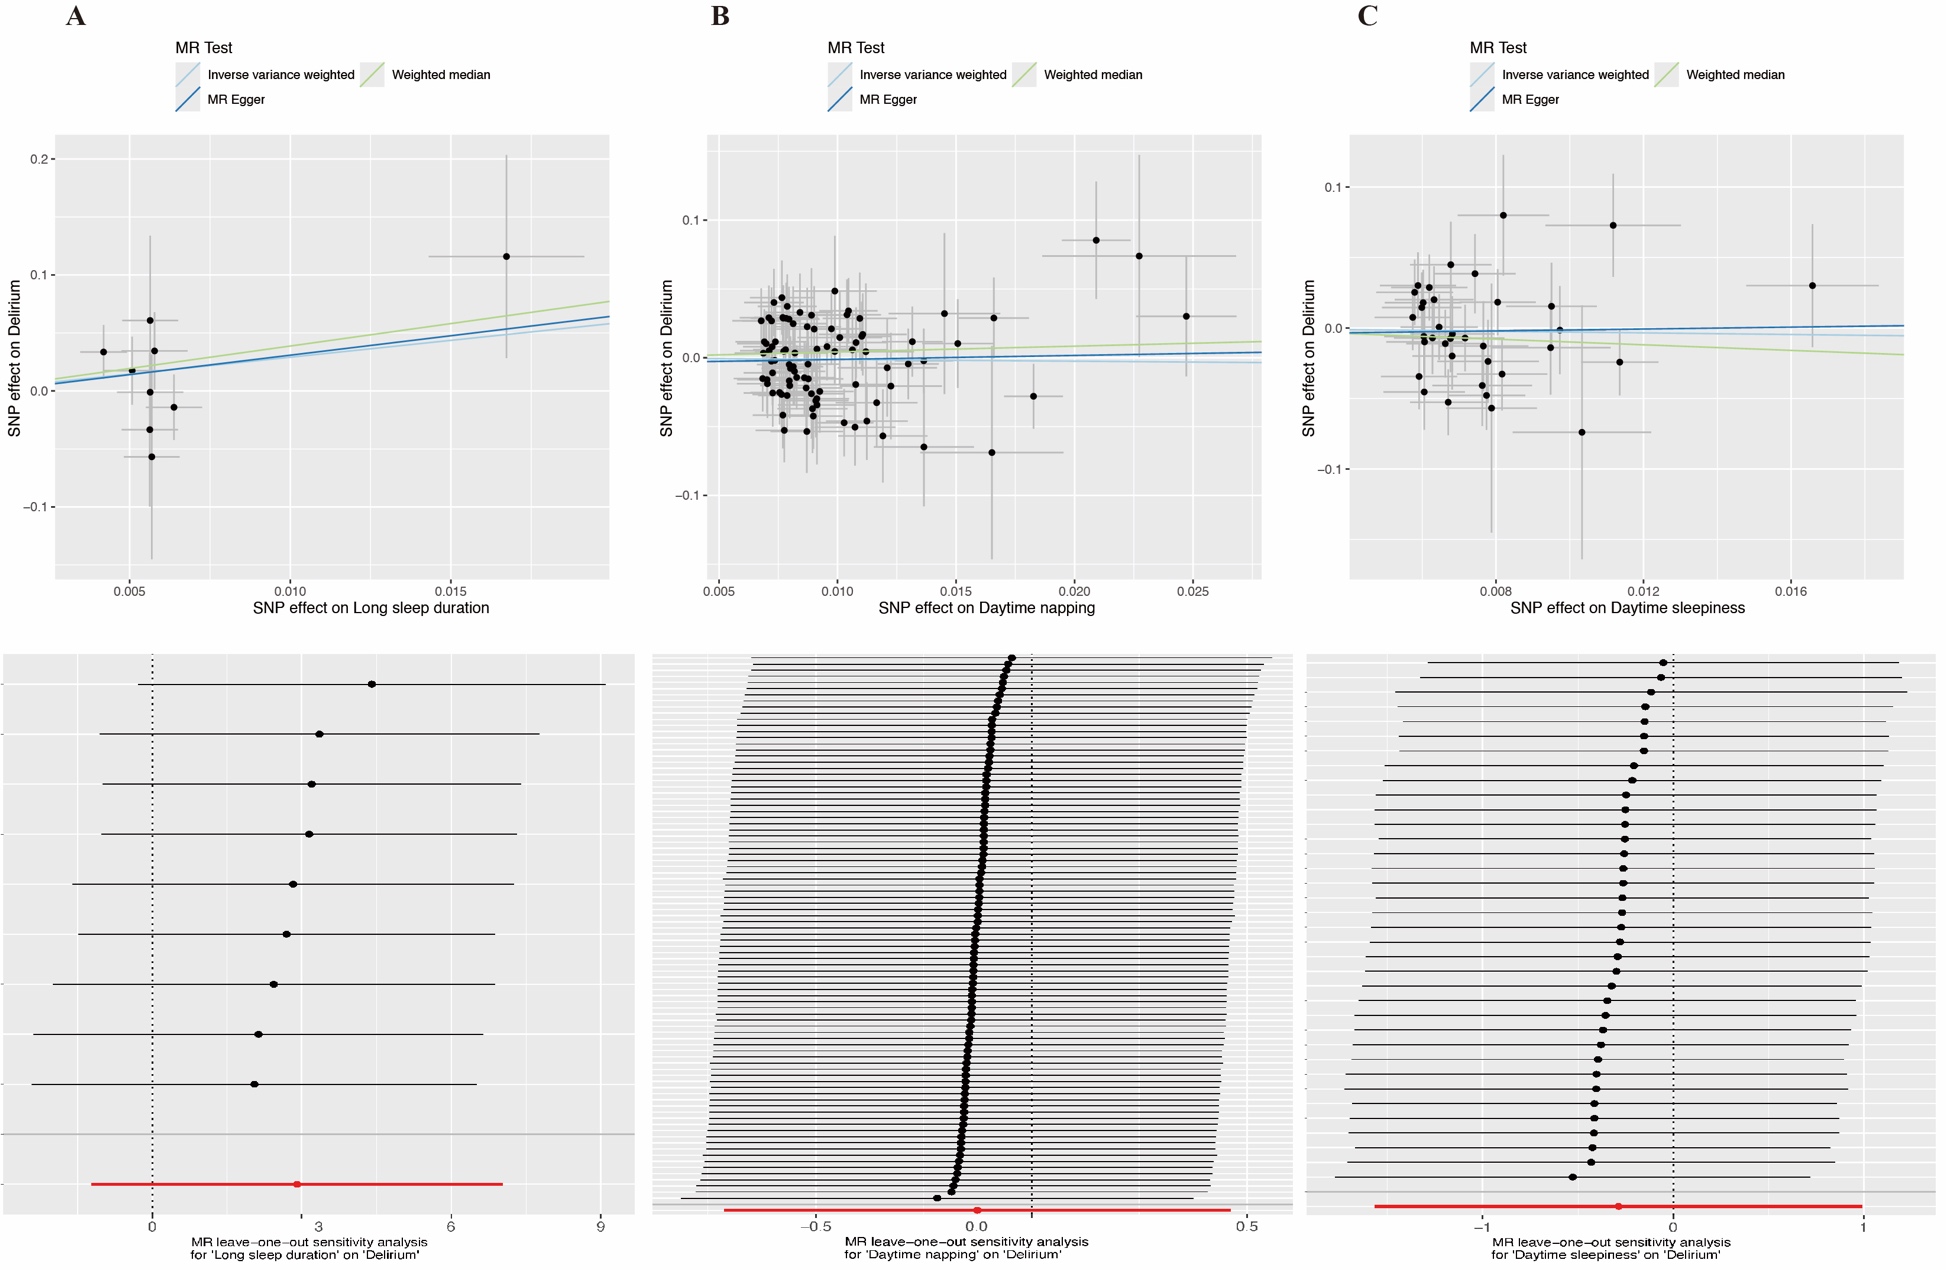
**

**Supplementary Figure 4. Forest plot (A) Scatter plot of the MR analysis and Leave-one-out sensitivity analysis of the effect of Insomnia on Delirium; (B) Scatter plot of the MR analysis and Leave-one-out sensitivity analysis of the effect of Number of sleep episodes on Delirium; (C) Scatter plot of the MR analysis and Leave-one-out sensitivity analysis of the effect of Sleep efficiency on Delirium**

**
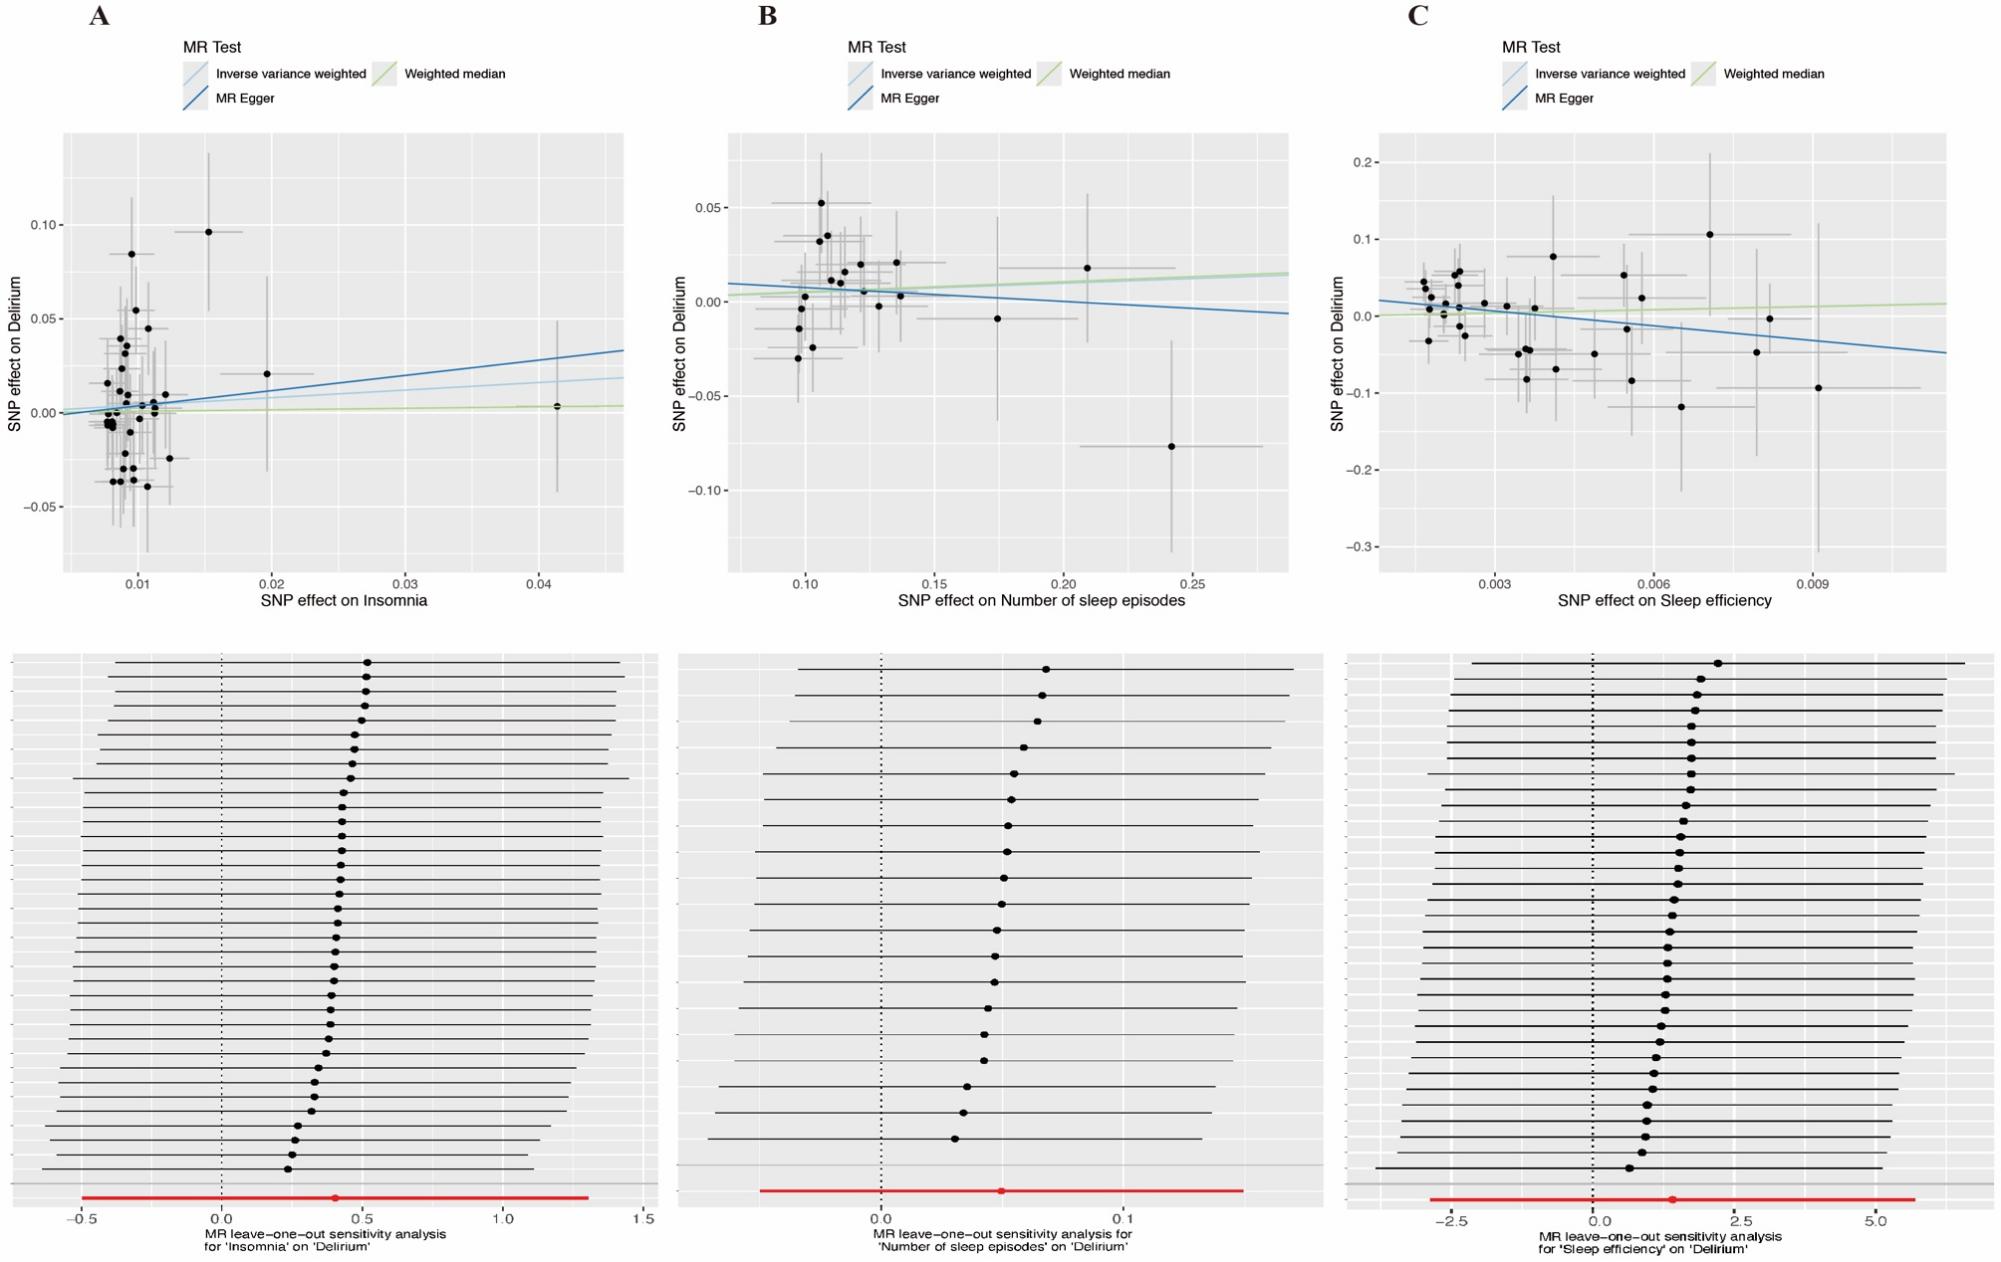
**

**Supplementary Figure 5. Forest plot (A) Scatter plot of the MR analysis and Leave-one-out sensitivity analysis of the effect of Chronotype on Delirium.**

**
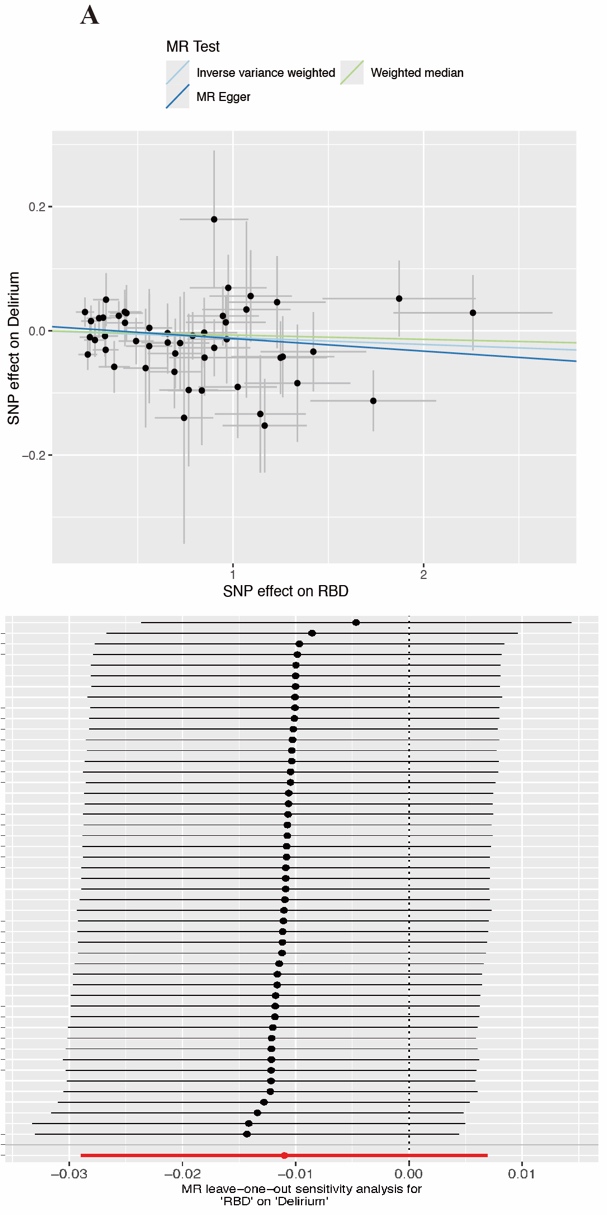
**

**Abbreviation:** RBD**,** Rapid-eye movement sleep behavior disorder.

**Supplementary Figure 6. Forest plot** **(A) Scatter plot of the MR analysis and Leave-one-out sensitivity analysis of the effect of Delirium on Sleep duration; (B) Scatter plot of the MR analysis and Leave-one-out sensitivity analysis of the effect of Delirium on Daytime napping; (C) Scatter plot of the MR analysis and Leave-one-out sensitivity analysis of the effect of Delirium on Daytime sleepiness;**

**
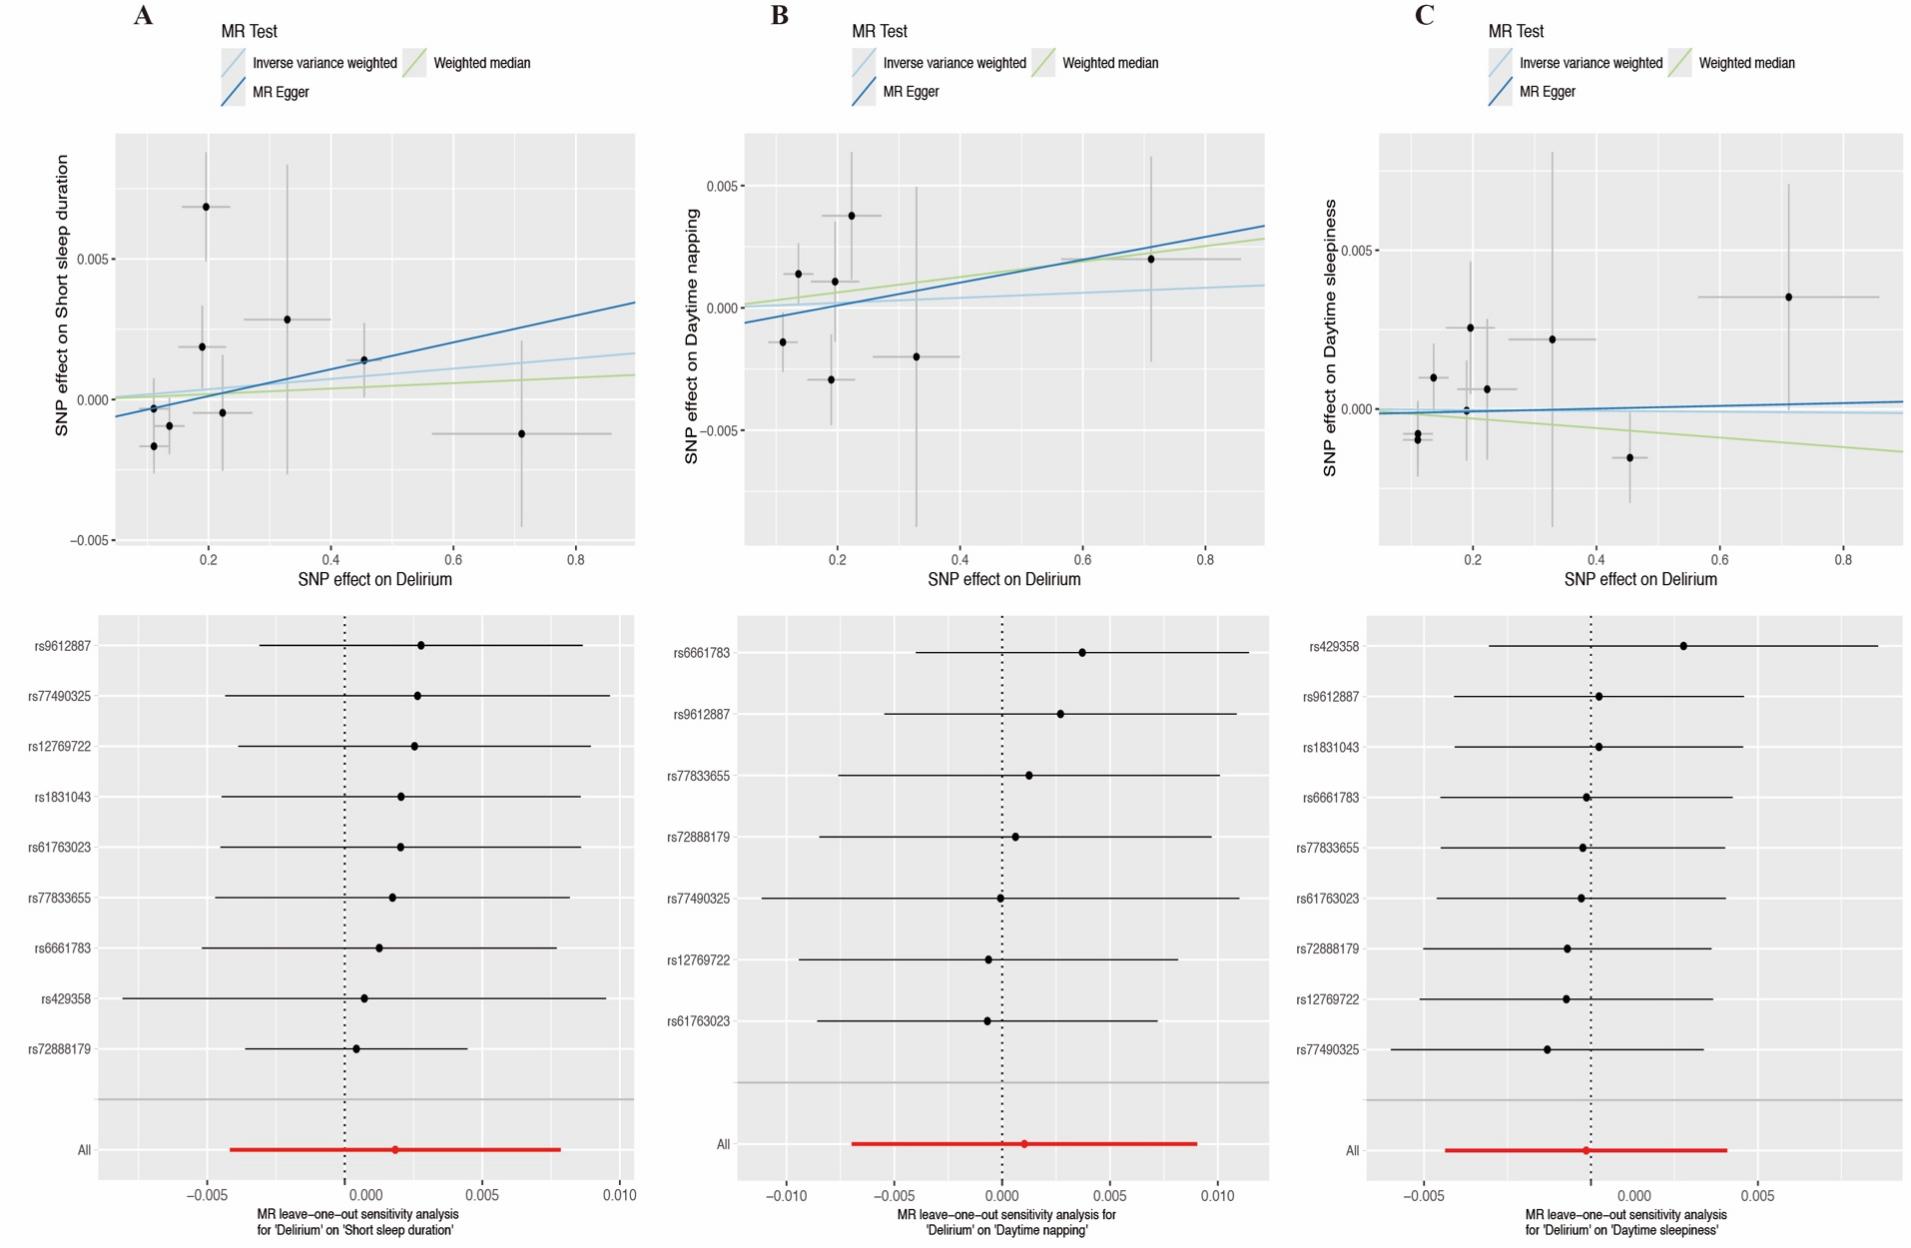
.**

**Supplementary Figure 7. Forest plot (A) Scatter plot of the MR analysis and Leave-one-out sensitivity analysis of the effect of Delirium on Sleep duration; (B) Scatter plot of the MR analysis and Leave-one-out sensitivity analysis of the effect of Delirium on RBD; (C) Scatter plot of the MR analysis and Leave-one-out sensitivity analysis of the effect of Delirium on Sleep efficiency;**

**
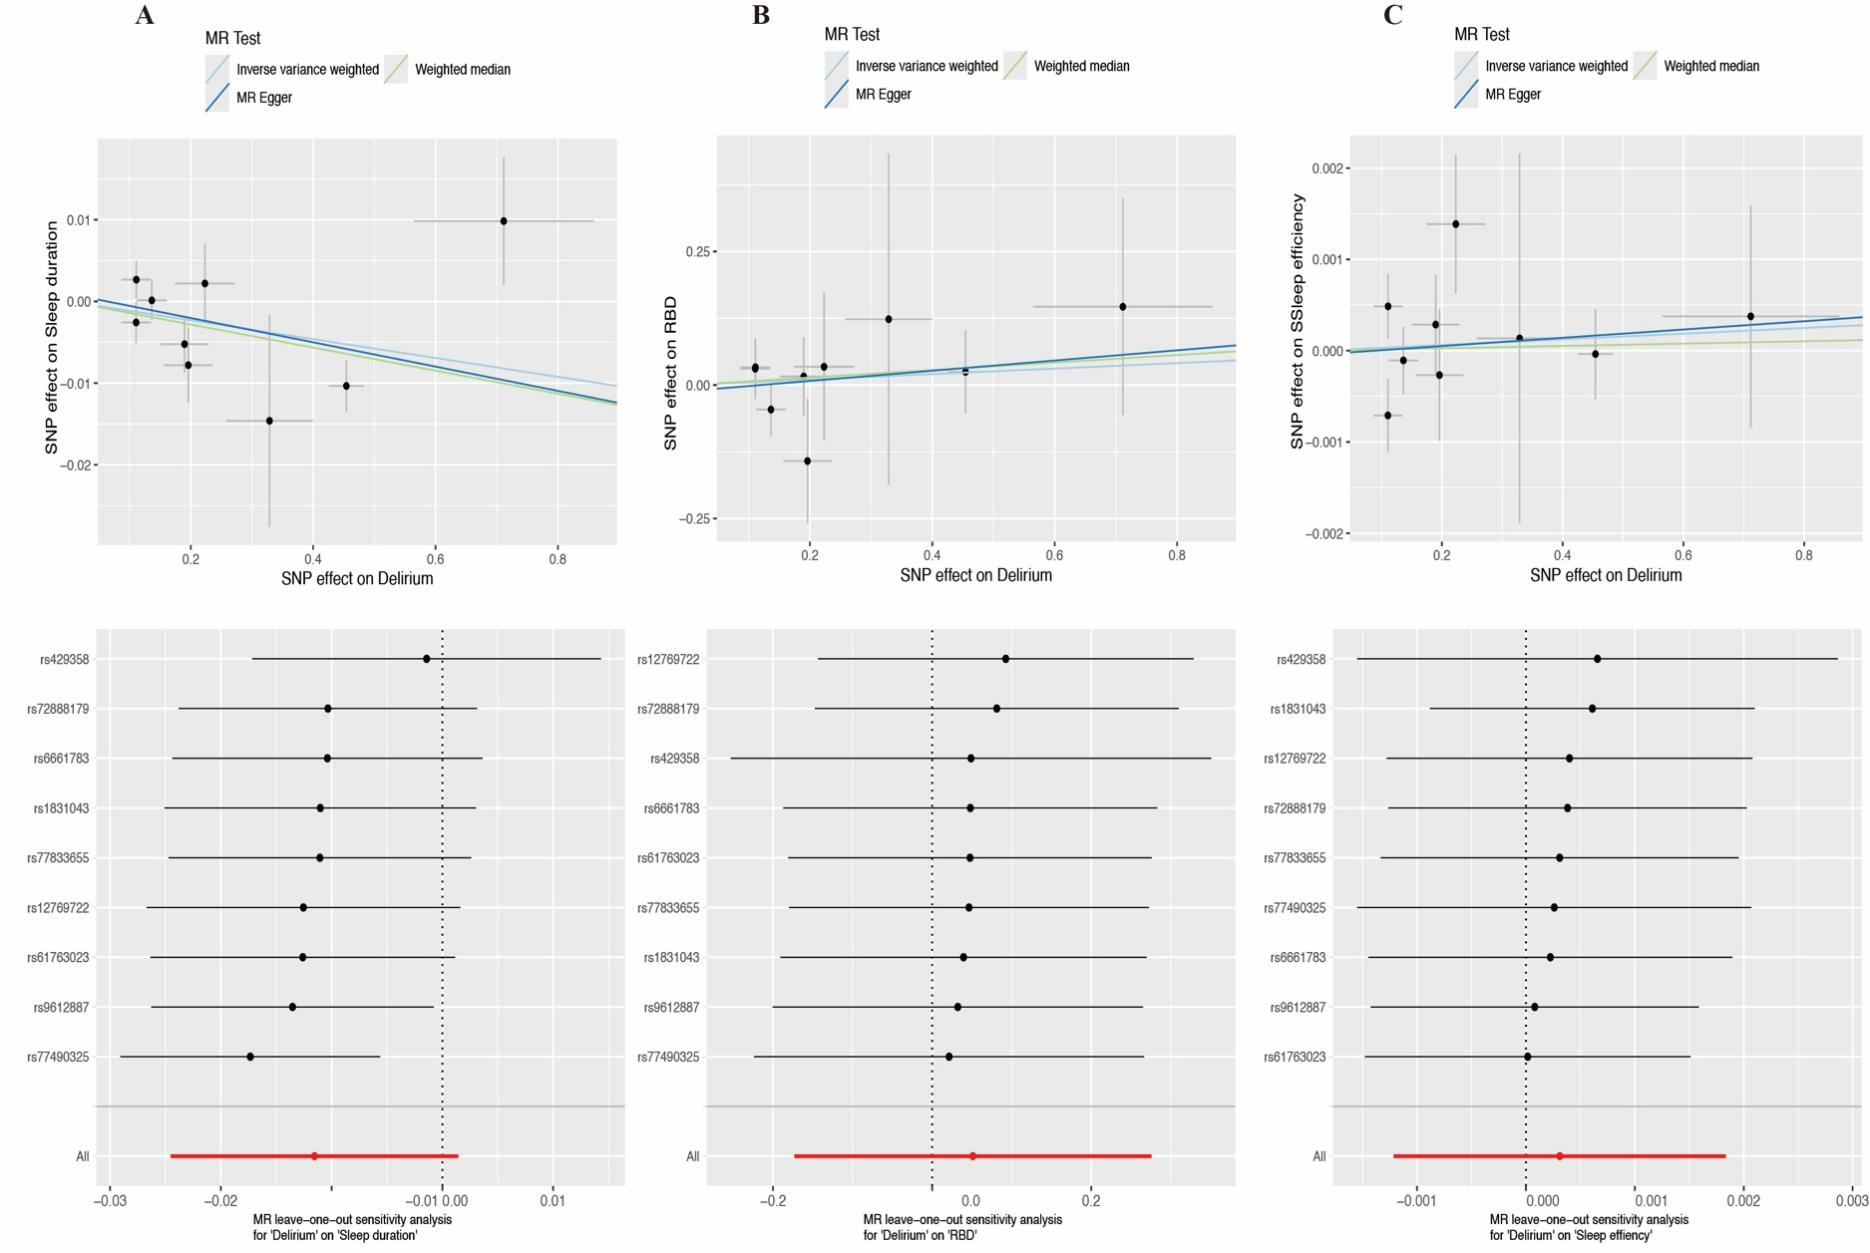
**

**Supplementary Figure 8. Forest plot (A) Scatter plot of the MR analysis and Leave-one-out sensitivity analysis of the effect of Delirium on Number of sleep episodes;**

**
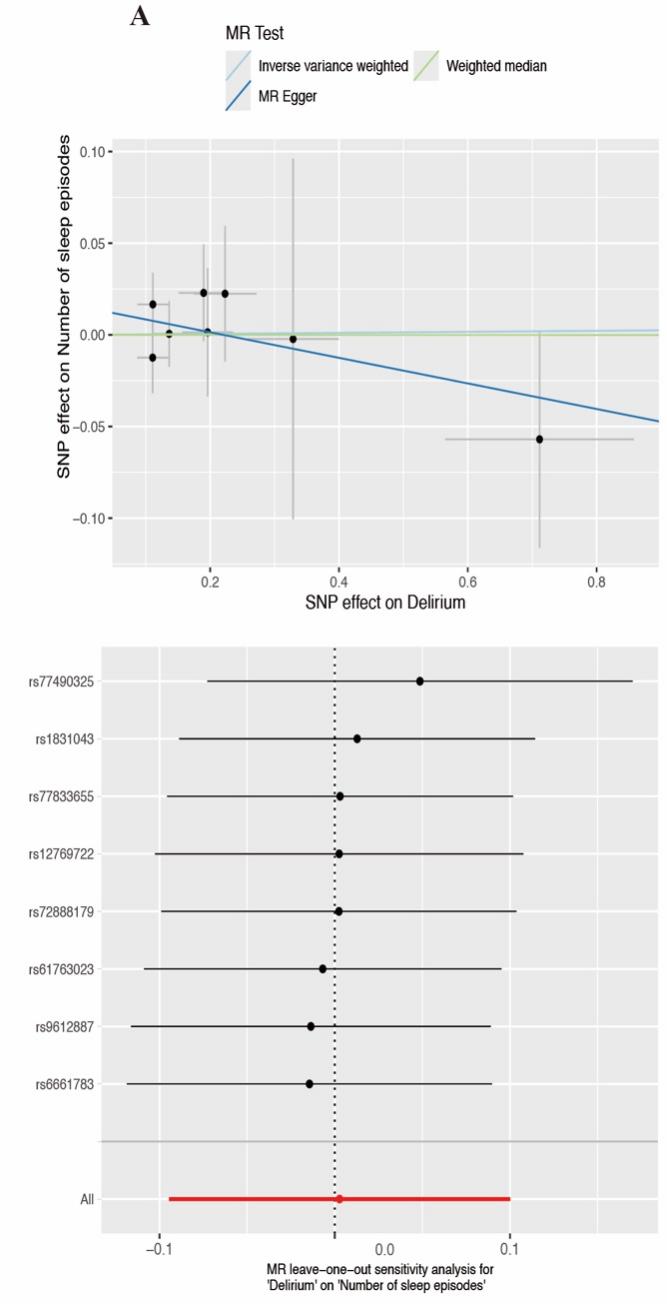
**
